# Supplementary material for: Prioritization before dereplication, an effective strategy to target new metabolites in whole extracts: ghosalin from Murraya paniculata root
Source: Royal Society of Chemistry journal article supplement (doi:10.1039/d4ay01359j), 2024-01-01
Supplement: d4ay01359j1.pdf [file d4ay01359j1.pdf]

## checkCIF (basic structural check) running

---

Checking for embedded fcf data in CIF ...

Found embedded fcf data in CIF. Extracting fcf data from uploaded CIF, please wait . .

## checkCIF/PLATON (basic structural check)

---

Structure factors have been supplied for datablock(s) Ghosalin\_auto

THIS REPORT IS FOR GUIDANCE ONLY. IF USED AS PART OF A REVIEW PROCEDURE FOR PUBLICATION, IT SHOULD NOT REPLACE THE EXPERTISE OF AN EXPERIENCED CRYSTALLOGRAPHIC REFEREE.

No syntax errors found. [CIF dictionary](#)

Please wait while processing.....[Interpreting this report](#)

[Structure factor report](#)

## Datablock: Ghosalin\_auto

---

Bond precision: C-C = 0.0058 Å Wavelength=1.54184

Cell: a=8.7363(5) b=9.2403(8) c=10.9458(5)  
alpha=81.948(6) beta=89.824(5) gamma=72.572(7)

Temperature: 293 K

|                        | Calculated  | Reported    |
|------------------------|-------------|-------------|
| Volume                 | 834.03(10)  | 834.03(10)  |
| Space group            | P -1        | P -1        |
| Hall group             | -P 1        | -P 1        |
| Moiety formula         | C17 H20 O6  | C17 H20 O6  |
| Sum formula            | C17 H20 O6  | C17 H20 O6  |
| Mr                     | 320.33      | 320.33      |
| Dx, g cm <sup>-3</sup> | 1.276       | 1.276       |
| Z                      | 2           | 2           |
| Mu (mm <sup>-1</sup> ) | 0.807       | 0.807       |
| F000                   | 340.0       | 340.0       |
| F000'                  | 341.17      |             |
| h,k,lmax               | 10,11,13    | 10,11,13    |
| Nref                   | 3305        | 3233        |
| Tmin,Tmax              | 0.865,0.908 | 0.744,1.000 |
| Tmin'                  | 0.865       |             |

Correction method= # Reported T Limits: Tmin=0.744 Tmax=1.000 AbsCorr =  
MULTI-SCAN

Data completeness= 0.978

Theta(max)= 72.400

R(reflections)= 0.0854( 2247)

wR2(reflections)= 0.2514(  
3233)

S = 1.186

Npar= 212

The following ALERTS were generated. Each ALERT has the format

**test-name\_ALERT\_alert-type\_alert-level.**

Click on the hyperlinks for more details of the test.

### ●Alert level C

[PLAT220\\_ALERT\\_2\\_C](#) NonSolvent Resd 1 O Ueq(max)/Ueq(min) Range 3.2 Ratio

[PLAT222\\_ALERT\\_3\\_C](#) NonSolvent Resd 1 H Uiso(max)/Uiso(min) Range 4.4 Ratio

[PLAT230\\_ALERT\\_2\\_C](#) Hirshfeld Test Diff for O00N --C00B . 6.5 s.u.

[PLAT242\\_ALERT\\_2\\_C](#) Low 'MainMol' Ueq as Compared to Neighbors of C00B Check

[PLAT242\\_ALERT\\_2\\_C](#) Low 'MainMol' Ueq as Compared to Neighbors of C00F Check

PLAT340\_ALERT\_3\_C Low Bond Precision on C-C Bonds.....0.0058 Ang.  
 PLAT412\_ALERT\_2\_C Short Intra XH3 .. XHn H00B ..H00D . 1.83 Ang.  
                   x,y,z = 1\_555 Check  
 PLAT413\_ALERT\_2\_C Short Inter XH3 .. XHn H00H ..H00A . 2.09 Ang.  
                   1-x,2-y,1-z = 2\_676 Check  
 PLAT906\_ALERT\_3\_C Large K Value in the Analysis of Variance..... 11.819 Check  
 PLAT906\_ALERT\_3\_C Large K Value in the Analysis of Variance.....2.447 Check  
 PLAT911\_ALERT\_3\_C Missing FCF Refl Between Thmin & STh/L= 0.600 23 Report  
     0 1 0, 10 3 0, -10 -3 1, 9 -2 1, 10 3 1, -5 -2 2,  
    -5 0 2, -7 -9 3, -1 -7 3, 3 -2 4, -7 3 4, 4 9 4,  
     4 10 4, -7 3 5, 1 -8 6, -9 0 6, 0 7 6, -4 -7 7,  
    -8 1 7, -6 -4 8, -5 5 9, 4 1 11, -4 0 12,  
 PLAT977\_ALERT\_2\_C Check Negative Difference Density on H00B . -0.42 eA-3  
 PLAT977\_ALERT\_2\_C Check Negative Difference Density on H00A . -0.37 eA-3

## Alert level G

PLAT002\_ALERT\_2\_G Number of Distance or Angle Restraints on AtSite 4 Note  
 PLAT007\_ALERT\_5\_G Number of Unrefined Donor-H Atoms ..... 1 Report  
     H00R  
 PLAT172\_ALERT\_4\_G The CIF-Embedded .res File Contains DFIX Records 1 Report  
 PLAT173\_ALERT\_4\_G The CIF-Embedded .res File Contains DANG Records 1 Report  
 PLAT199\_ALERT\_1\_G Reported \_cell\_measurement\_temperature ..... (K) 293 Check  
 PLAT200\_ALERT\_1\_G Reported \_diffrn\_ambient\_temperature ..... (K) 293 Check  
 PLAT343\_ALERT\_2\_G Unusual sp? Angle Range in Main Residue for C00B Check  
 PLAT367\_ALERT\_2\_G Long? C(sp?)-C(sp?) Bond C008 - C00B . 1.50 Ang.  
 PLAT398\_ALERT\_2\_G Deviating C-O-C Angle From 120 for O002 . 108.5 Degree  
 PLAT398\_ALERT\_2\_G Deviating C-O-C Angle From 120 for O003 . 109.1 Degree  
 PLAT720\_ALERT\_4\_G Number of Unusual/Non-Standard Labels ..... 43 Note  
     O001 O002 O003 O004 O005 C006 C007 H007  
     C008 H008 C009 C00A C00B H00B C00C C00D  
     C00E H00E C00F C00G H00G C00H H00H C00I  
     H00I C00J H00A H00C H00D C00K H00F H00J  
     H00K C00L H00L H00M H00N C00M H00O H00P  
     H00Q O00N H00R  
 PLAT793\_ALERT\_4\_G Model has Chirality at C007 (Centro SpGr) S Verify  
 PLAT793\_ALERT\_4\_G Model has Chirality at C008 (Centro SpGr) S Verify  
 PLAT860\_ALERT\_3\_G Number of Least-Squares Restraints ..... 2 Note  
 PLAT912\_ALERT\_4\_G Missing # of FCF Reflections Above STh/L= 0.600 49 Note  
 PLAT941\_ALERT\_3\_G Average HKL Measurement Multiplicity.....2.5 Low  
 PLAT969\_ALERT\_5\_G The 'Henn et al.' R-Factor-gap value.....3.203 Note  
     Predicted wR2: Based on SigI\*\*2 7.85 or SHELX Weight 21.20  
 PLAT978\_ALERT\_2\_G Number C-C Bonds with Positive Residual Density. 0 Info  
 PLAT992\_ALERT\_5\_G Repd & Actual \_reflns\_number\_gt Values Differ by 4 Check

0 **ALERT level A** = Most likely a serious problem - resolve or explain  
 0 **ALERT level B** = A potentially serious problem, consider carefully  
 13 **ALERT level C** = Check. Ensure it is not caused by an omission or oversight  
 19 **ALERT level G** = General information/check it is not something unexpected

2 ALERT type 1 CIF construction/syntax error, inconsistent or missing data  
 14 ALERT type 2 Indicator that the structure model may be wrong or deficient  
 7 ALERT type 3 Indicator that the structure quality may be low  
 6 ALERT type 4 Improvement, methodology, query or suggestion  
 3 ALERT type 5 Informative message, check

It is advisable to attempt to resolve as many as possible of the alerts in all categories. Often the minor alerts point to easily fixed oversights, errors and omissions in your CIF or refinement strategy, so attention to these fine details can be worthwhile. In order to resolve some of the more serious problems it may be necessary to carry out additional measurements or structure refinements. However, the purpose of your study may justify the reported deviations and the more serious of these should normally be commented upon in the discussion or experimental section of a paper or in the "special\_details" fields of the CIF. checkCIF was carefully designed to identify outliers and unusual parameters, but every test has its limitations and alerts that are not important in a particular case may appear. Conversely, the absence of alerts does not guarantee there are no aspects of the results needing attention. It is up to the individual to critically assess their own results and, if necessary, seek expert advice.

**Publication of your CIF in IUCr journals**

A basic structural check has been run on your CIF. These basic checks will be run on all CIFs submitted for publication in IUCr journals (*Acta Crystallographica*, *Journal of Applied Crystallography*, *Journal of Synchrotron Radiation*); however, if you intend to submit to *Acta Crystallographica Section C* or *E* or *IUCrData*, you should make sure that **full publication checks** are run on the final version of your CIF prior to submission.

**Publication of your CIF in other journals**

Please refer to the *Notes for Authors* of the relevant journal for any special instructions relating to CIF submission.

PLATON version of 13/05/2024; check.def file version of 04/05/2024

**Datablock Ghosalin\_auto - ellipsoid plot**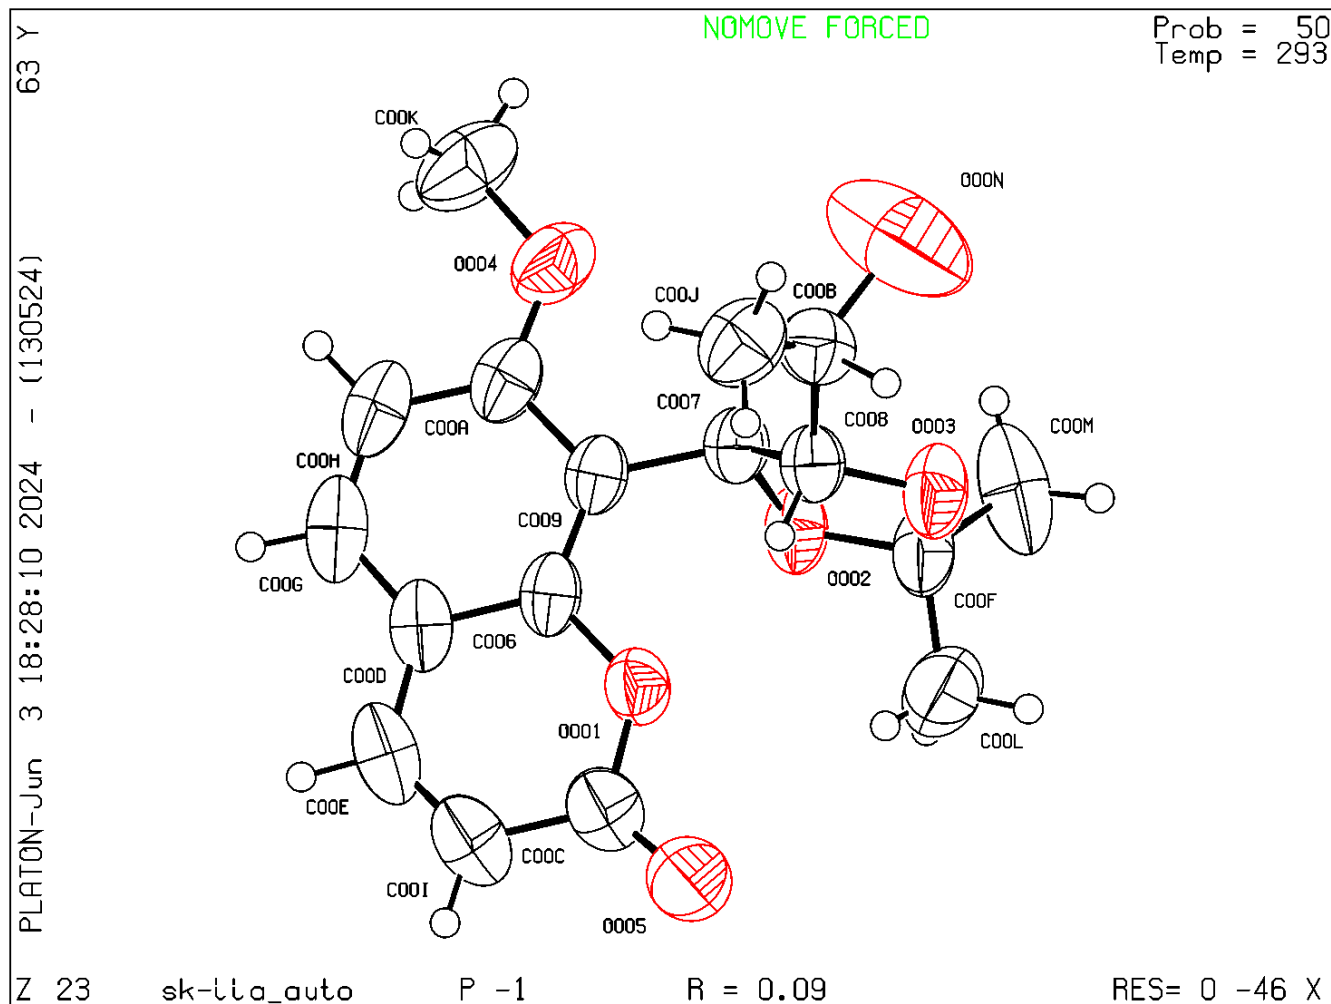

[Download CIF editor \(pubCIF\) from the IUCr](#)  
[Download CIF editor \(enCIFer\) from the CCDC](#)  
[Test a new CIF entry](#)
