# Supplementary material for: Prioritization before dereplication, an effective strategy to target new metabolites in whole extracts: ghosalin from Murraya paniculata root
Source: Royal Society of Chemistry journal article supplement (doi:10.1039/d4ay01359j), 2024-01-01
Supplement: d4ay01359j3.pdf [file d4ay01359j3.pdf]

## Supporting Information

### **Prioritization before dereplication, an effective strategy to target new metabolites in whole extract: Ghosalin from *Murraya paniculata* root**

Sanju Kumari,<sup>1</sup> Sanheeta Chakrabarty,<sup>2</sup> Sanjay Kumar,<sup>2</sup> Sanjeev Kumar<sup>4</sup>, Jac Fredo Agastinose Ronickom,<sup>1</sup> Shreyans K. Jain<sup>2\*</sup>

<sup>1</sup>School of Biomedical Engineering, Indian Institute of Technology (Banaras Hindu University), Varanasi, 221005, Uttar Pradesh, India

<sup>2</sup>Department of Pharmaceutical Engineering and Technology, Indian Institute of Technology (Banaras Hindu University), Varanasi, 221005, Uttar Pradesh, India

<sup>4</sup>Department of Dravyaguna, Faculty of Ayurveda, Institute of Medical Sciences (Banaras Hindu University), Varanasi, 221005, Uttar Pradesh, India

\*Corresponding author

Shreyans K. Jain, Department of Pharmaceutical Engineering and Technology, Indian Institute of Technology (Banaras Hindu University), Varanasi-221005, Uttar Pradesh

Email address: [sjain.phe@iitbhu.ac.in](mailto:sjain.phe@iitbhu.ac.in)

## **Table of contents:**

- S.1. Flow chart representing isolation scheme
- S.2. TIC of LC-HRMS of crude
- S.3. HPLCs of crude on cartridge column for fractionation
- S.4. HPLCs of Ghosalin (1)
- S.5. Chemical structures of compounds isolated from *M. paniculata*
- S.6. Data NMR
- S.7. DNP search for compounds in *M. paniculata*
- S.8. DNP search for aromatic compounds in *M. paniculata*
- S.9. DNP search for coumarin compounds in *M. paniculata*

### **Spectral information of compound 1 (Ghosalin)**

- S.10. UV Spectra of compound 1
- S.11. X-ray data of compound 1
- S.12. <sup>1</sup>H NMR spectrum of compound 1 in CDCl<sub>3</sub>
- S.13. <sup>13</sup>C NMR spectrum of compound 1 in CDCl<sub>3</sub>
- S.14. DEPT-135 NMR spectrum of compound 1 in CDCl<sub>3</sub>
- S.15. HSQC spectrum of compound 1 in CDCl<sub>3</sub>
- S.16. HMBC spectrum of compound 1 in CDCl<sub>3</sub>
- S.17. <sup>1</sup>H-<sup>1</sup>H COSY NMR spectrum of compound 1 in CDCl<sub>3</sub>
- S.18. NOESY spectrum of compound 1 in CDCl<sub>3</sub>
- S.19. UV Spectra of compound 2

### **Spectral information of compound 3**

- S.20. UV Spectra of compound 3
- S.21. <sup>1</sup>H NMR spectrum of compound 3 in CD<sub>3</sub>OD
- S.22. <sup>13</sup>C NMR spectrum of compound 3 in CD<sub>3</sub>OD
- S.23. DEPT-135 NMR spectrum of compound 3 in CD<sub>3</sub>OD
- S.24. HSQC spectrum of compound 3 in CD<sub>3</sub>OD
- S.25. HMBC spectrum of compound 3 in CD<sub>3</sub>OD
- S.26. <sup>1</sup>H-<sup>1</sup>H COSY NMR spectrum of compound 3 in CD<sub>3</sub>OD
- S.27. NOESY spectrum of compound 3 in CD<sub>3</sub>OD

### **Spectral information of compound 4**

- S.28. UV Spectra of compound 4
- S.29. <sup>1</sup>H NMR spectrum of compound 4 in CDCl<sub>3</sub>
- S.30. <sup>13</sup>C NMR spectrum of compound 4 in CDCl<sub>3</sub>
- S.31. DEPT-135 NMR spectrum of compound 4 in CDCl<sub>3</sub>
- S.32. HSQC spectrum of compound 4 in CDCl<sub>3</sub>

**S.33.** HMBC spectrum of compound 4 in CDCl<sub>3</sub>

**S.34.** <sup>1</sup>H-<sup>1</sup>H COSY NMR spectrum of compound 4 in CDCl<sub>3</sub>

**S 35.** DoU calculation

### S.1. Flow chart of isolation scheme

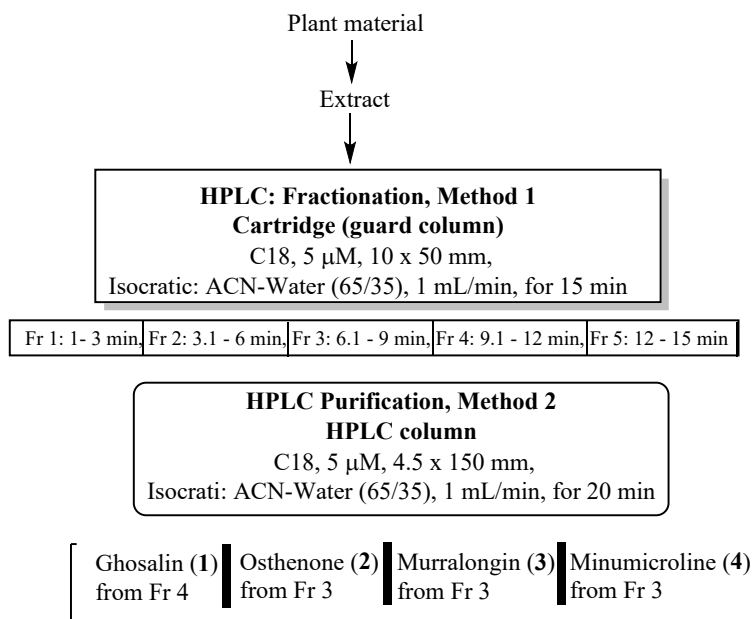

### S.2. TIC of LC-HRMS of crude

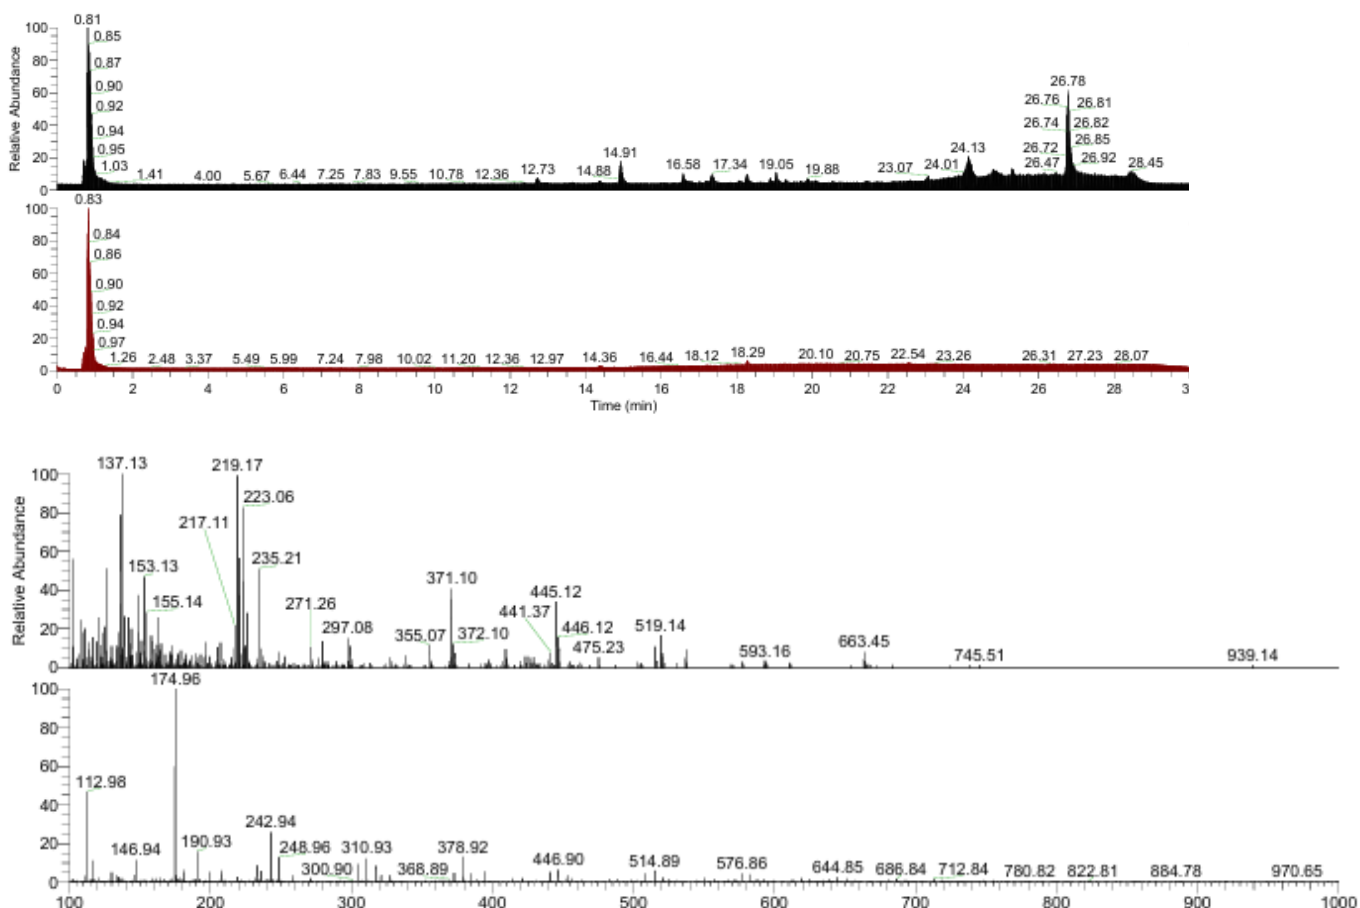

### S.3. HPLCs of crude on cartridge column for fractionation.

#### <Chromatogram>

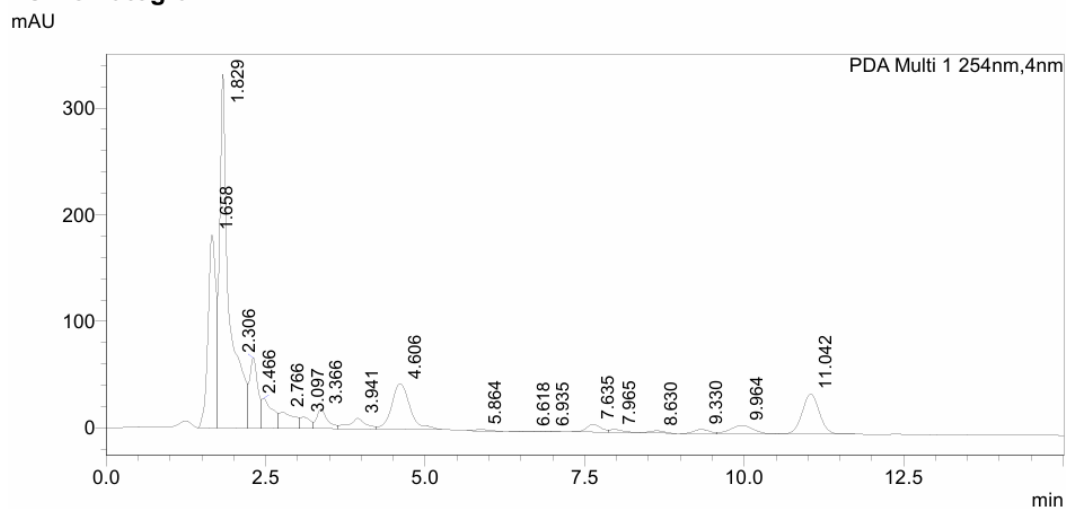

### S.4. HPLCs of Ghosalin (1).

#### <Chromatogram>

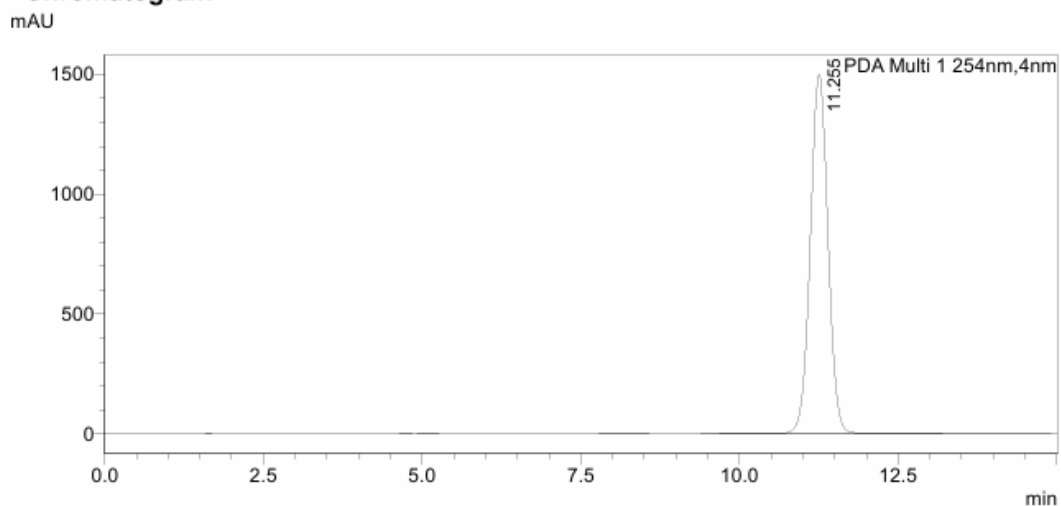

### S.5. Chemical structures of compounds isolated from *M. paniculata*

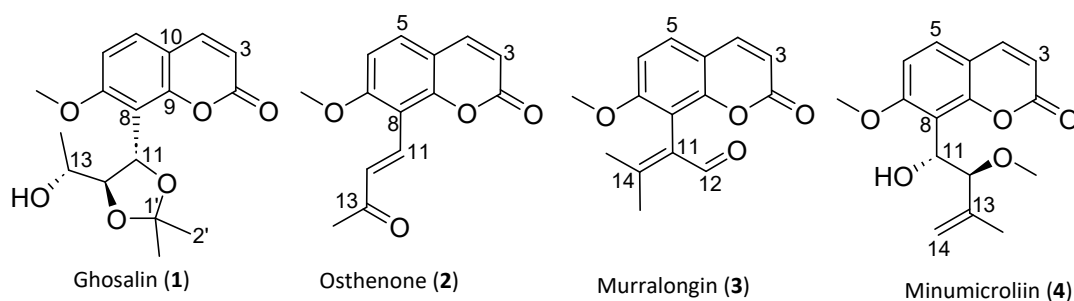

### S.6. Data NMR

Ghosalin (1): Rectangular crystals, SC-XRD analysis HRESIMS  $m/z$  321.1331  $[M+H]^+$  calcd for  $C_{17}H_{20}O_6+H^+$   $^1H$  NMR (500 MHz,  $CDCl_3$ )  $\delta$  7.53(d, 1H,  $J=10$ ), 7.33(d, 1H,  $J=10$ ), 6.80(d, 1H,  $J=5$ ), 6.17(d,

1H, J=10), 5.49(d, 1H, J=5), 4.94(d, 1H, J=10), 4.89(s, 1H), 4.78(s, 1H), 3.86(s, 3H), 1.63(d, 6H, J=20), 1.47(s, 3H). <sup>13</sup>C NMR (126 MHz, CDCl<sub>3</sub>) δ 161.4, 160.4, 154.1, 143.6, 141.5, 129.3, 113.4, 113.2, 111.9, 109.6, 108.1, 81.6, 72.7, 56.3, 27.4, 27.1, 17.6.

Osthenone (2). Transparent needles. HRESIMS *m/z* 245.0793 [M+H]<sup>+</sup> (calcd for C<sub>14</sub>H<sub>12</sub>O<sub>4</sub>+H<sup>+</sup>, 245.0803)

Murranlongin (3): 20 mg, White powder, HRMESIMS *m/z* 259.0948 [M+H]<sup>+</sup> (calcd for C<sub>15</sub>H<sub>14</sub>O<sub>4</sub>+H<sup>+</sup>, 259.0965). <sup>1</sup>H NMR (500 MHz, MeOD) δ 10.13 (s, 1H), 7.81 (d, 1H, J=10), 7.53 (d, 1H, J=10), 6.99 (d, 1H, J=10), 6.12 (d, 1H, J=10), 3.76 (s, 3H), 2.36 (s, 3H), 1.70 (s, 3H). <sup>13</sup>C NMR (126 MHz, MeOD) δ 189.9, 161.9, 161.3, 160.4, 152.5, 144.8, 129.4, 129.1, 113.1, 112.8, 112, 108, 55.5, 23.7, 18.4.

Minumicrolin (4) 35 mg, White particles, HRMESIMS *m/z* 299.0891 [M+Na]<sup>+</sup> (calcd for C<sub>15</sub>H<sub>16</sub>O<sub>5</sub> +Na<sup>+</sup>, 299.0890). <sup>1</sup>H NMR (600 MHz, CDCl<sub>3</sub>) δ 7.77(d, 1H, J=10), 7.54(d, 1H, J=10), 7.03(d, 1H, J=5), 6.39(d, 1H, J=10), 5.56(t, 1H, J=5), 5.11(d, 2H, J=10), 4.66(d, 1H, J=10), 4.11(s, 3H), 2.03(s, 3H). <sup>13</sup>C NMR (151 MHz, CDCl<sub>3</sub>) δ 161, 160.8, 153.8, 145.6, 144.3, 129, 117, 114.3, 113.9, 113.7, 108.5, 78.9, 69, 56.9, 18.5.

### S.7. DNP search for compounds in *M. paniculata*

### S.8. DNP search for aromatic compounds in *M. paniculata*

S.9. DNP search for coumarin compounds in *M. paniculata*

Spectral information of compound 1

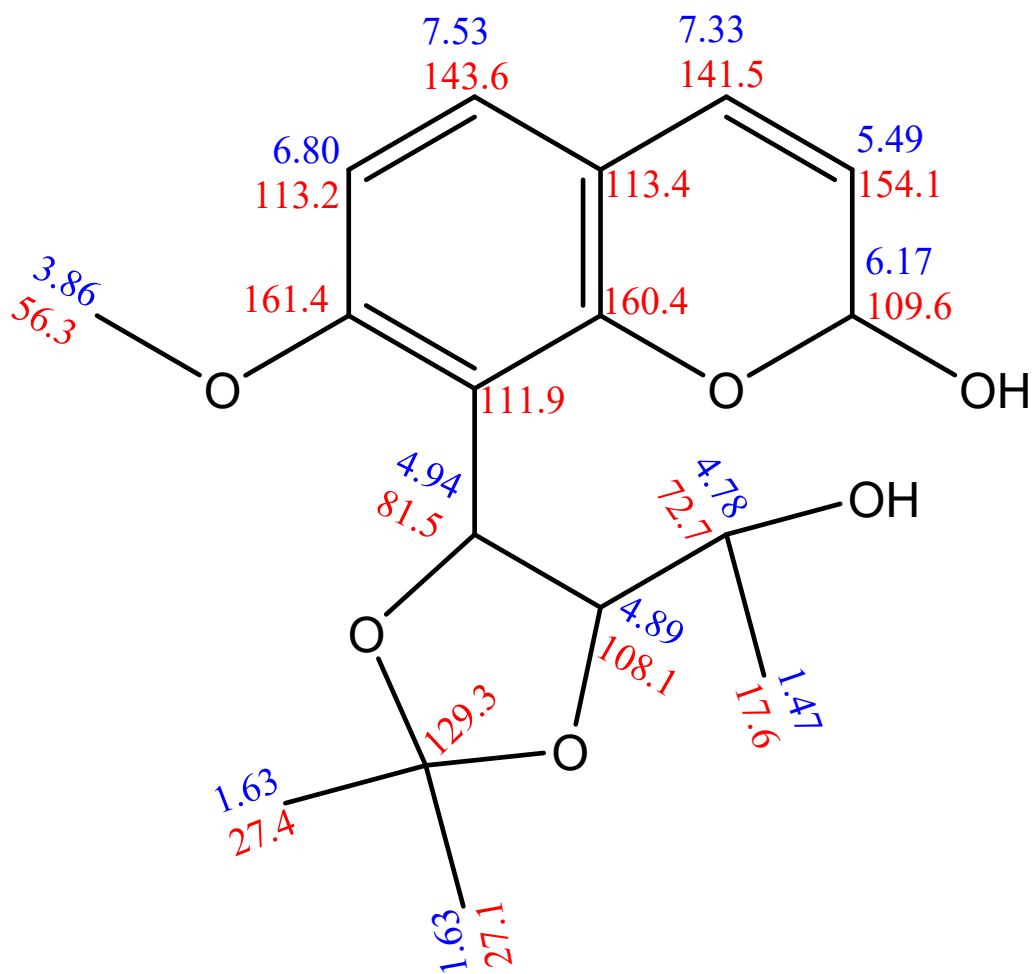

S.10. UV Spectra of compound 1

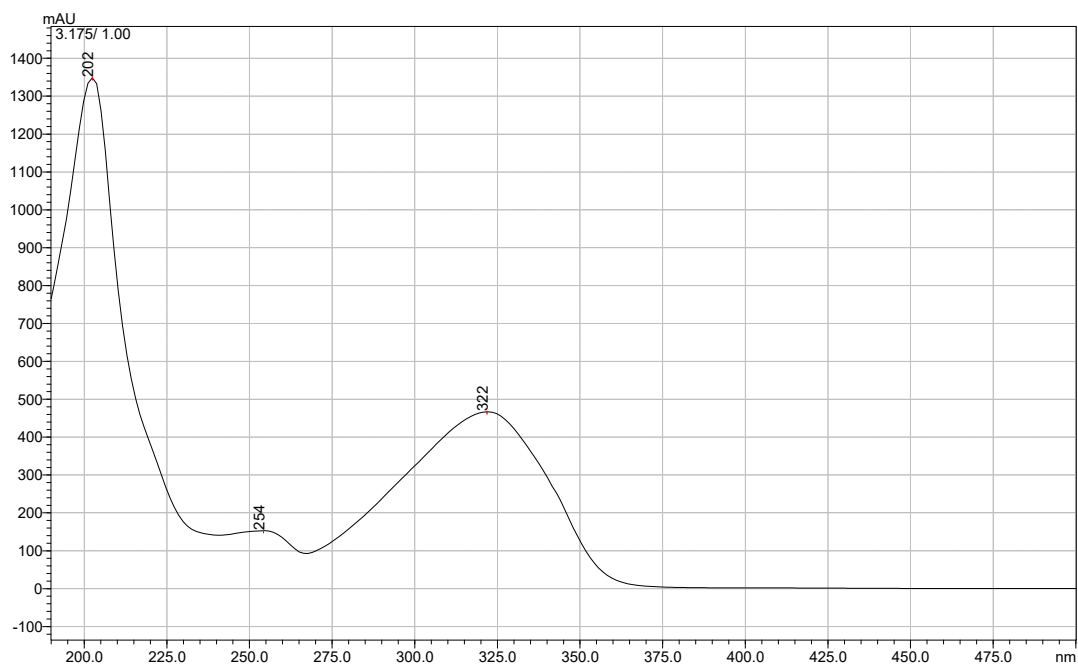

### S.11. X-ray data of compound 1

Table 2 Fractional Atomic Coordinates ( $\times 10^4$ ) and Equivalent Isotropic Displacement Parameters ( $\text{\AA}^2 \times 10^3$ ) for ov\_SK-IIA\_auto.  $U_{eq}$  is defined as 1/3 of the trace of the orthogonalised  $U_{ij}$  tensor.

| Atom | x       | y        | z       | U(eq)     |
|------|---------|----------|---------|-----------|
| O001 | 7709(3) | 5231(3)  | 4139(2) | 62.8(6)   |
| O002 | 6225(3) | 6132(3)  | 1716(2) | 65.3(7)   |
| O003 | 8365(3) | 6785(3)  | 888(2)  | 76.1(8)   |
| O004 | 3711(3) | 9865(3)  | 2777(3) | 83.5(9)   |
| O005 | 9715(4) | 3131(4)  | 4682(3) | 98.0(10)  |
| C006 | 6391(4) | 6375(4)  | 4394(3) | 57.4(8)   |
| C007 | 6244(4) | 7521(4)  | 2135(3) | 56.6(8)   |
| C008 | 7969(4) | 7554(4)  | 1943(3) | 58.4(8)   |
| C009 | 5695(4) | 7538(4)  | 3440(3) | 56.8(8)   |
| C00A | 4366(4) | 8727(5)  | 3723(4) | 66.8(9)   |
| C00B | 8114(4) | 9136(4)  | 1684(4) | 66.9(9)   |
| C00C | 8538(5) | 4010(5)  | 5003(4) | 73.0(10)  |
| C00D | 5798(4) | 6311(5)  | 5591(3) | 65.8(9)   |
| C00E | 6580(5) | 5019(6)  | 6477(3) | 78.4(12)  |
| C00F | 7495(5) | 5728(5)  | 875(3)  | 70.0(10)  |
| C00G | 3783(5) | 8705(6)  | 4914(4) | 81.5(12)  |
| C00H | 7869(5) | 3939(6)  | 6220(4) | 79.6(12)  |
| C00I | 4484(5) | 7504(6)  | 5811(4) | 83.0(13)  |
| O00J | 8678(6) | 9682(6)  | 2608(5) | 143.5(17) |
| C00K | 2310(5) | 11057(6) | 2986(6) | 100.8(16) |
| C00L | 8509(7) | 4124(6)  | 1317(6) | 110.1(18) |
| C00M | 6798(7) | 5922(8)  | -409(4) | 120(2)    |
| C00N | 7609(9) | 10036(7) | 440(5)  | 127(2)    |



| Atom | $U_{11}$ | $U_{22}$ | $U_{33}$ | $U_{23}$  | $U_{13}$ | $U_{12}$  |
|------|----------|----------|----------|-----------|----------|-----------|
| O001 | 55.6(13) | 75.8(16) | 54.3(13) | -6.7(11)  | 10.1(10) | -17.3(11) |
| O002 | 66.7(15) | 82.5(16) | 60.2(13) | -23.7(12) | 21.3(11) | -36.9(12) |
| O003 | 81.8(17) | 88.4(18) | 75.3(17) | -31.4(14) | 36.2(13) | -43.3(14) |
| O004 | 61.5(16) | 76.8(18) | 103(2)   | -19.3(16) | 13.2(14) | -4.7(13)  |
| O005 | 71.7(19) | 104(2)   | 94(2)    | 6.4(18)   | 13.7(16) | 0.5(17)   |
| C006 | 48.2(17) | 76(2)    | 56.4(18) | -22.5(16) | 13.4(14) | -25.8(16) |
| C007 | 50.8(18) | 65(2)    | 56.4(18) | -12.5(15) | 7.7(13)  | -19.9(15) |
| C008 | 52.7(18) | 69(2)    | 56.3(18) | -10.9(15) | 10.4(14) | -22.2(15) |
| C009 | 47.7(17) | 70(2)    | 58.3(18) | -18.4(16) | 11.4(14) | -22.1(15) |
| C00A | 56(2)    | 72(2)    | 80(2)    | -29(2)    | 14.2(17) | -22.9(17) |
| C00B | 60(2)    | 69(2)    | 76(2)    | -9.6(18)  | 5.8(16)  | -24.5(17) |
| C00C | 64(2)    | 90(3)    | 66(2)    | -3(2)     | -0.6(17) | -28(2)    |
| C00D | 62(2)    | 95(3)    | 53.1(19) | -23.6(18) | 13.6(15) | -37.2(19) |
| C00E | 82(3)    | 125(4)   | 47.5(19) | -16(2)    | 9.9(17)  | -58(3)    |
| C00F | 83(3)    | 79(2)    | 62(2)    | -26.1(18) | 30.1(18) | -38(2)    |
| C00G | 68(2)    | 93(3)    | 91(3)    | -43(3)    | 29(2)    | -23(2)    |
| C00H | 72(3)    | 110(3)   | 61(2)    | 2(2)      | 0.5(18)  | -40(2)    |
| C00I | 78(3)    | 123(4)   | 67(2)    | -44(3)    | 28(2)    | -46(3)    |
| O00J | 141(4)   | 138(4)   | 175(4)   | -61(3)    | 20(3)    | -60(3)    |
| C00K | 56(2)    | 82(3)    | 160(5)   | -29(3)    | 18(3)    | -10(2)    |
| C00L | 129(4)   | 76(3)    | 126(4)   | -24(3)    | 62(3)    | -27(3)    |
| C00M | 140(5)   | 193(6)   | 65(3)    | -40(3)    | 31(3)    | -97(5)    |
| C00N | 187(6)   | 108(4)   | 96(4)    | 25(3)     | -27(4)   | -78(4)    |

| Atom | Atom | Length/ $\text{\AA}$ |
|------|------|----------------------|
| O001 | C006 | 1.369(4)             |
| O001 | C00C | 1.382(5)             |
| O002 | C007 | 1.426(4)             |
| O002 | C00F | 1.435(4)             |
| O003 | C008 | 1.427(4)             |
| O003 | C00F | 1.408(4)             |
| O004 | C00A | 1.358(5)             |
| O004 | C00K | 1.423(5)             |
| O005 | C00C | 1.191(5)             |
| C006 | C009 | 1.383(5)             |
| C006 | C00D | 1.408(5)             |
| C007 | C008 | 1.530(4)             |
| C007 | C009 | 1.506(4)             |
| C008 | C00B | 1.493(5)             |
| C009 | C00A | 1.408(5)             |
| C00A | C00G | 1.397(6)             |
| C00B | O00J | 1.347(6)             |
| C00B | C00N | 1.485(6)             |

Table 4 Bond Lengths for ov\_SK-IIA\_auto.

| Atom | Atom | Length/Å |
|------|------|----------|
| C00C | C00H | 1.454(6) |
| C00D | C00E | 1.423(6) |
| C00D | C00I | 1.380(6) |
| C00E | C00H | 1.322(6) |
| C00F | C00L | 1.493(7) |
| C00F | C00M | 1.499(6) |
| C00G | C00I | 1.365(7) |

Table 5 Bond Angles for ov\_SK-IIA\_auto.

| Atom | Atom | Atom | Angle/°  |
|------|------|------|----------|
| C006 | O001 | C00C | 123.8(3) |
| C007 | O002 | C00F | 108.4(2) |
| C00F | O003 | C008 | 109.5(2) |
| C00A | O004 | C00K | 118.6(4) |
| O001 | C006 | C009 | 117.4(3) |
| O001 | C006 | C00D | 119.3(3) |
| C009 | C006 | C00D | 123.3(3) |
| O002 | C007 | C008 | 103.6(3) |
| O002 | C007 | C009 | 110.1(3) |
| C009 | C007 | C008 | 115.9(3) |
| O003 | C008 | C007 | 101.5(3) |
| O003 | C008 | C00B | 110.7(3) |
| C00B | C008 | C007 | 113.5(3) |
| C006 | C009 | C007 | 122.8(3) |
| C006 | C009 | C00A | 116.8(3) |
| C00A | C009 | C007 | 120.3(3) |
| O004 | C00A | C009 | 115.9(3) |
| O004 | C00A | C00G | 123.3(4) |
| C00G | C00A | C009 | 120.8(4) |
| O00J | C00B | C008 | 117.7(4) |
| O00J | C00B | C00N | 123.4(4) |
| C00N | C00B | C008 | 118.9(4) |
| O001 | C00C | C00H | 115.8(4) |
| O005 | C00C | O001 | 117.3(4) |
| O005 | C00C | C00H | 126.9(4) |
| C006 | C00D | C00E | 117.8(4) |
| C00I | C00D | C006 | 117.3(4) |
| C00I | C00D | C00E | 124.9(4) |
| C00H | C00E | C00D | 121.9(4) |
| O002 | C00F | C00L | 108.1(3) |
| O002 | C00F | C00M | 109.7(4) |
| O003 | C00F | O002 | 106.5(3) |
| O003 | C00F | C00L | 111.8(4) |
| O003 | C00F | C00M | 107.7(3) |

Table 5 Bond Angles for ov\_SK-IIA\_auto.

| Atom | Atom | Atom | Angle/°  |
|------|------|------|----------|
| C00L | C00F | C00M | 112.8(4) |
| C00I | C00G | C00A | 119.9(4) |
| C00E | C00H | C00C | 121.2(4) |
| C00G | C00I | C00D | 121.9(4) |

Table 6 Torsion Angles for ov\_SK-IIA\_auto.

| A    | B    | C    | D    | Angle/°   |
|------|------|------|------|-----------|
| O001 | C006 | C009 | C007 | 5.0(5)    |
| O001 | C006 | C009 | C00A | -178.4(3) |
| O001 | C006 | C00D | C00E | -1.8(5)   |
| O001 | C006 | C00D | C00I | 178.9(3)  |
| O001 | C00C | C00H | C00E | -2.4(6)   |
| O002 | C007 | C008 | O003 | 31.5(3)   |
| O002 | C007 | C008 | C00B | 150.3(3)  |
| O002 | C007 | C009 | C006 | 54.2(4)   |
| O002 | C007 | C009 | C00A | -122.2(3) |
| O003 | C008 | C00B | O00J | -143.2(4) |
| O003 | C008 | C00B | C00N | 37.8(5)   |
| O004 | C00A | C00G | C00I | 178.6(4)  |
| O005 | C00C | C00H | C00E | 177.6(4)  |
| C006 | O001 | C00C | O005 | -176.2(3) |
| C006 | O001 | C00C | C00H | 3.8(5)    |
| C006 | C009 | C00A | O004 | 179.3(3)  |
| C006 | C009 | C00A | C00G | -0.7(5)   |
| C006 | C00D | C00E | C00H | 3.1(6)    |
| C006 | C00D | C00I | C00G | -0.3(6)   |
| C007 | O002 | C00F | O003 | 5.7(4)    |
| C007 | O002 | C00F | C00L | 126.0(4)  |
| C007 | O002 | C00F | C00M | -110.6(4) |
| C007 | C008 | C00B | O00J | 103.4(4)  |
| C007 | C008 | C00B | C00N | -75.6(5)  |
| C007 | C009 | C00A | O004 | -4.0(5)   |
| C007 | C009 | C00A | C00G | 175.9(3)  |
| C008 | O003 | C00F | O002 | 16.0(4)   |
| C008 | O003 | C00F | C00L | -101.8(4) |
| C008 | O003 | C00F | C00M | 133.7(4)  |
| C008 | C007 | C009 | C006 | -63.0(4)  |
| C008 | C007 | C009 | C00A | 120.6(4)  |
| C009 | C006 | C00D | C00E | 177.3(3)  |
| C009 | C006 | C00D | C00I | -2.0(5)   |
| C009 | C007 | C008 | O003 | 152.3(3)  |
| C009 | C007 | C008 | C00B | -89.0(4)  |
| C009 | C00A | C00G | C00I | -1.4(6)   |
| C00A | C00G | C00I | C00D | 1.9(6)    |



**S.12.**  $^1\text{H}$  NMR spectrum of compound 1 in  $\text{CDCl}_3$

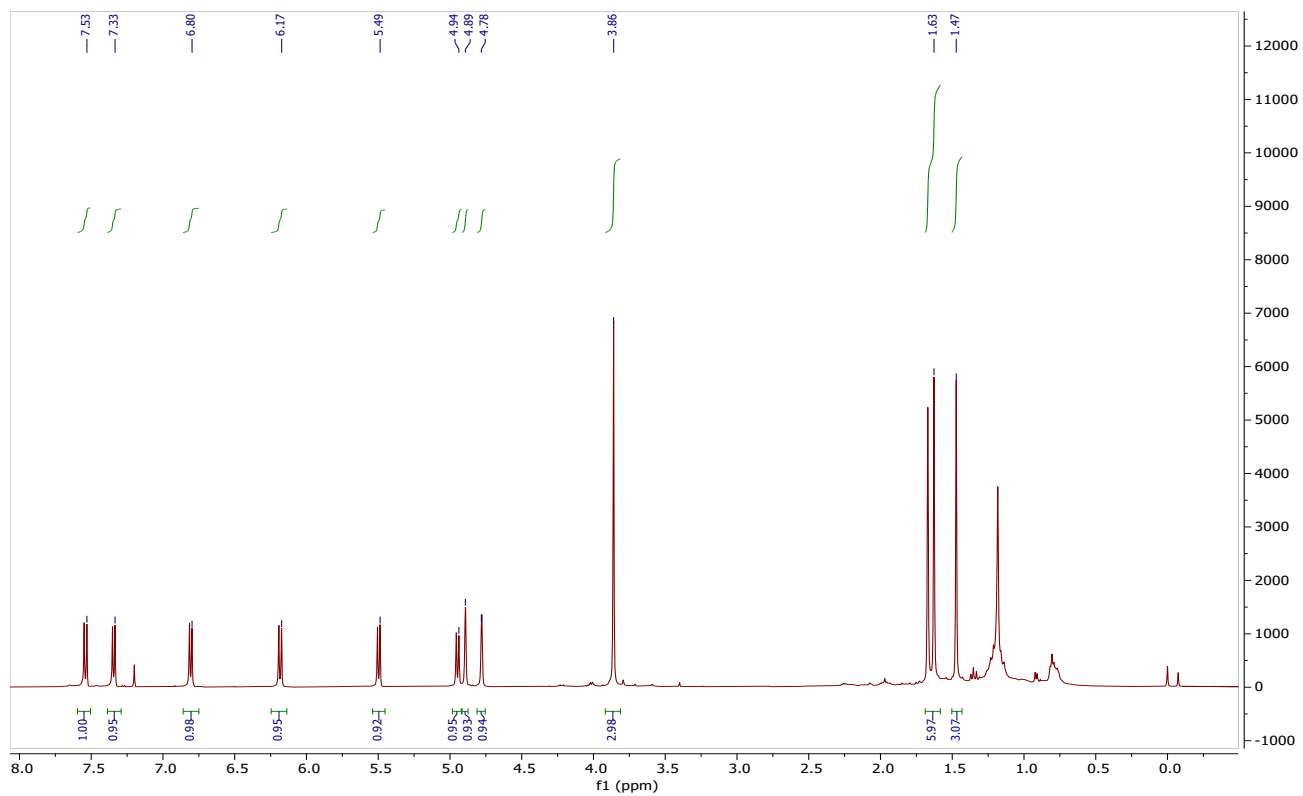

**S.13.**  $^{13}\text{C}$  NMR spectrum of compound 1 in  $\text{CDCl}_3$

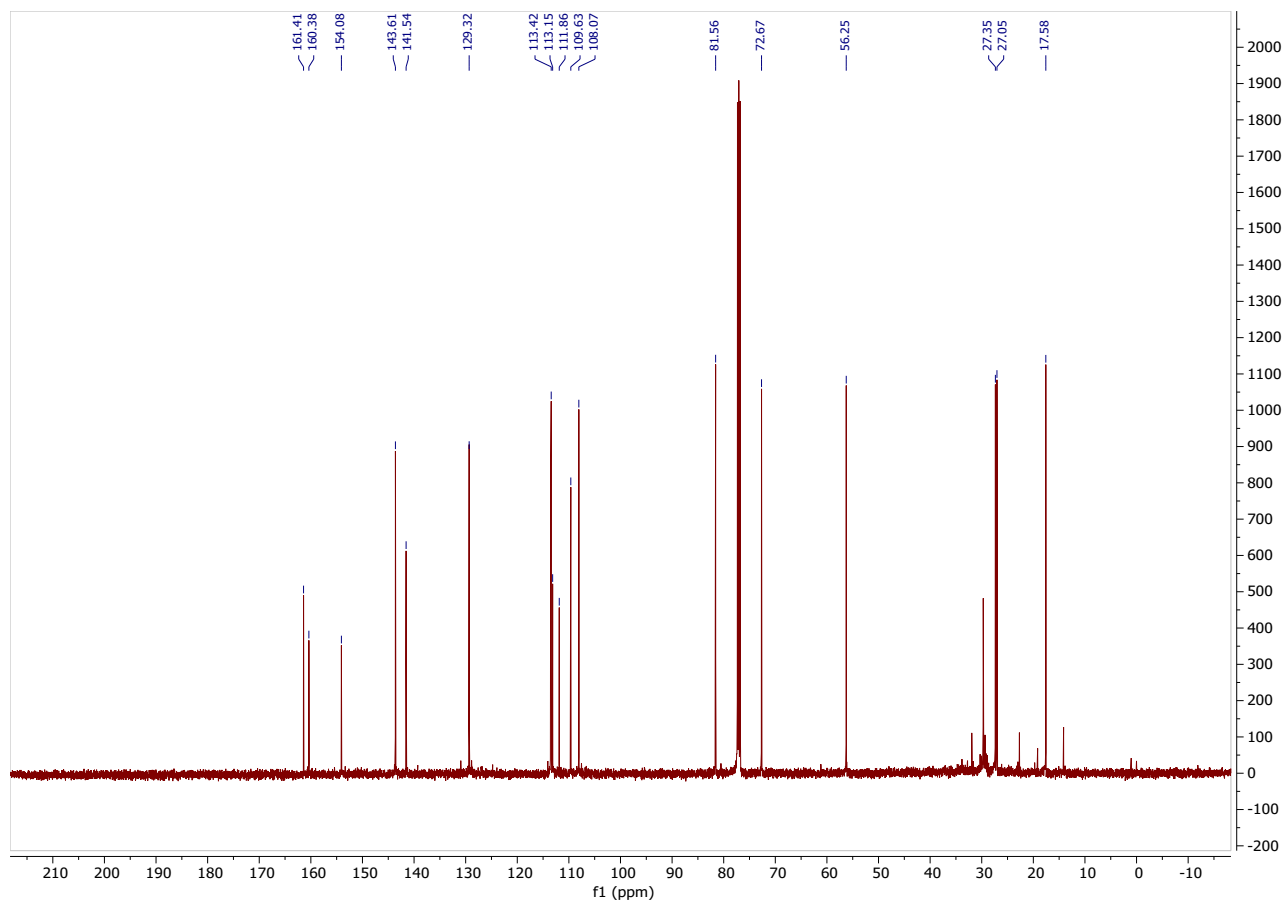

**S.14.** DEPT-135 NMR spectrum of compound 1 in CDCl<sub>3</sub>

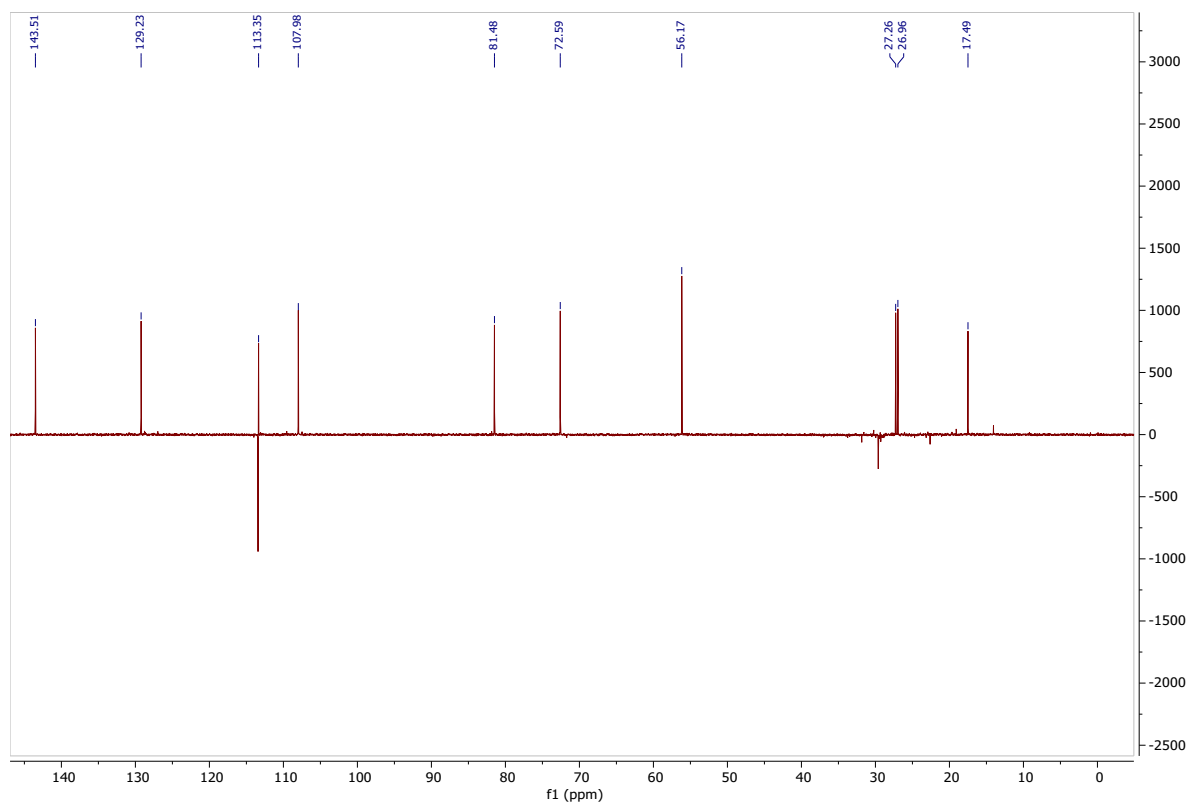

S.15. HSQC spectrum of compound 1 in CDCl<sub>3</sub>

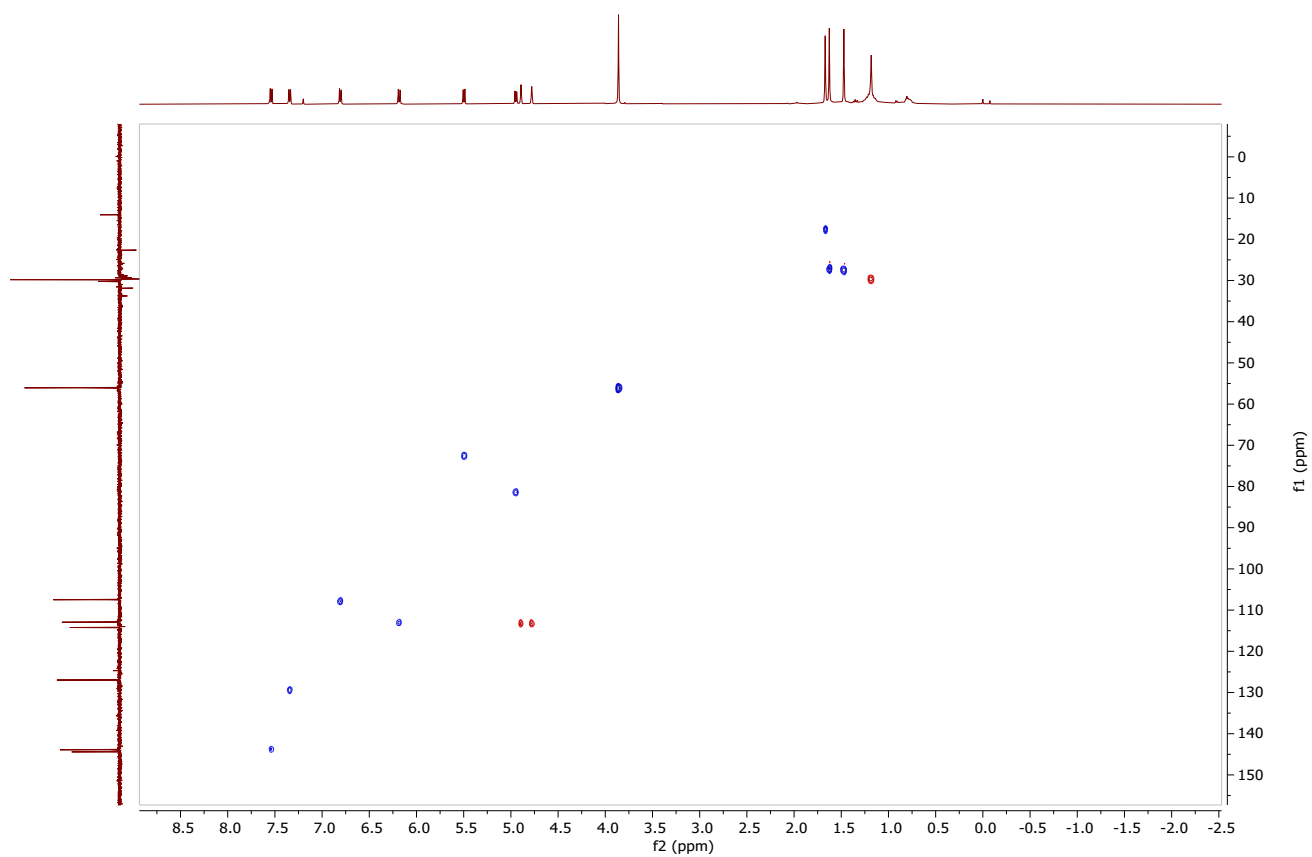

**S.16.** HMBC spectrum of compound 1 in CDCl<sub>3</sub>

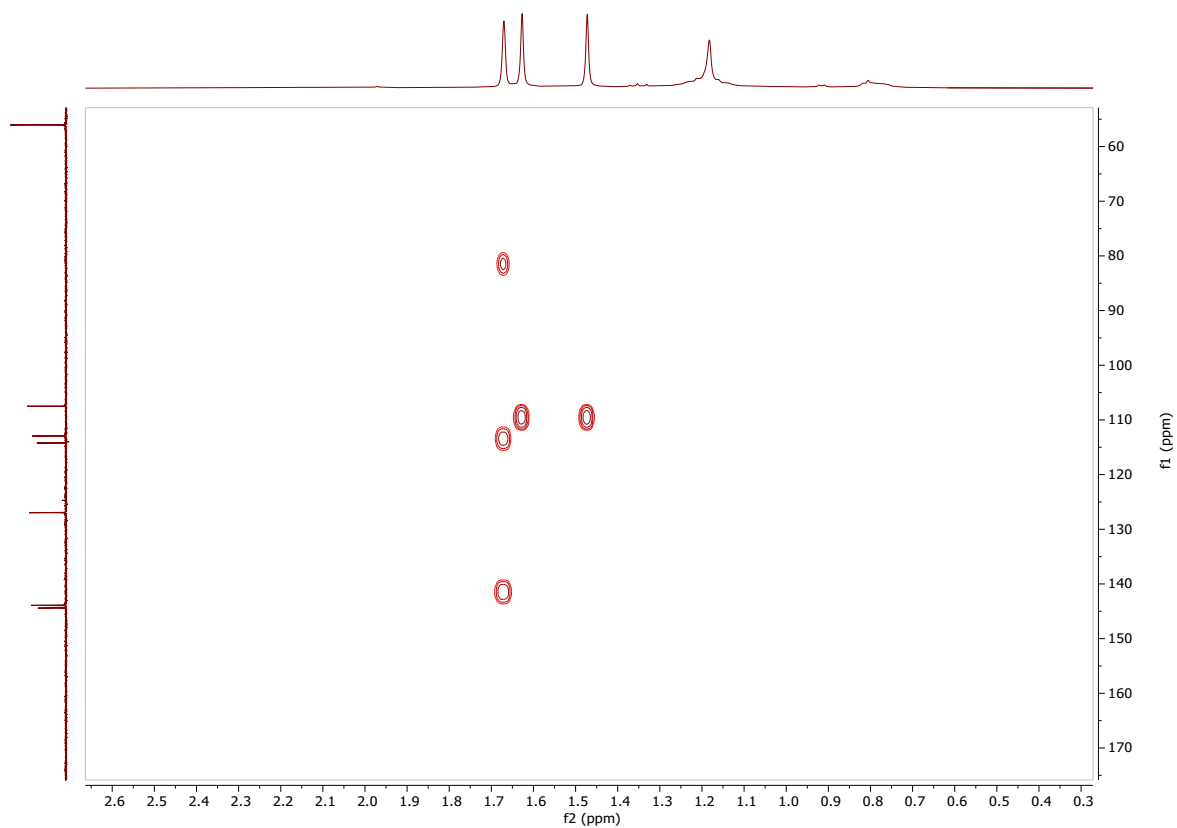

**S.17:** <sup>1</sup>H-<sup>1</sup>H COSY NMR spectrum of compound 1 in CDCl<sub>3</sub>

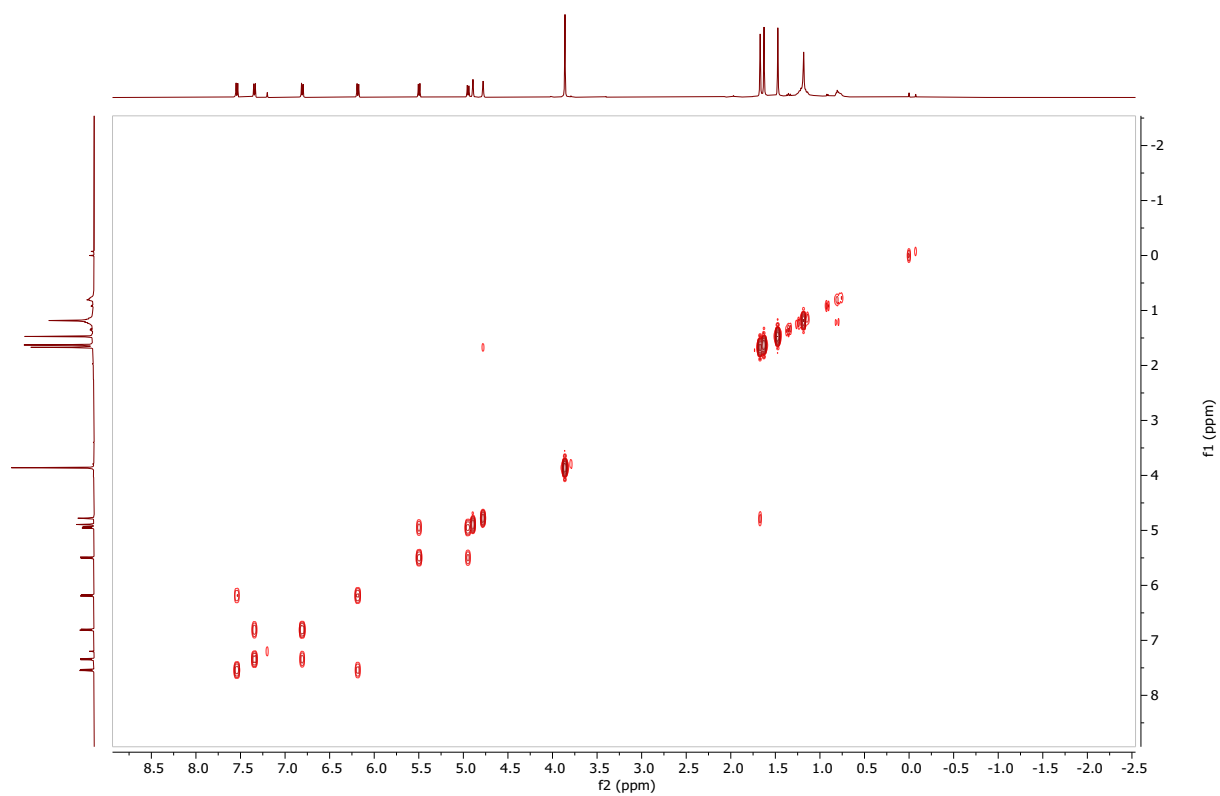



S.18. NOESY spectrum of compound 1 in CDCl<sub>3</sub>

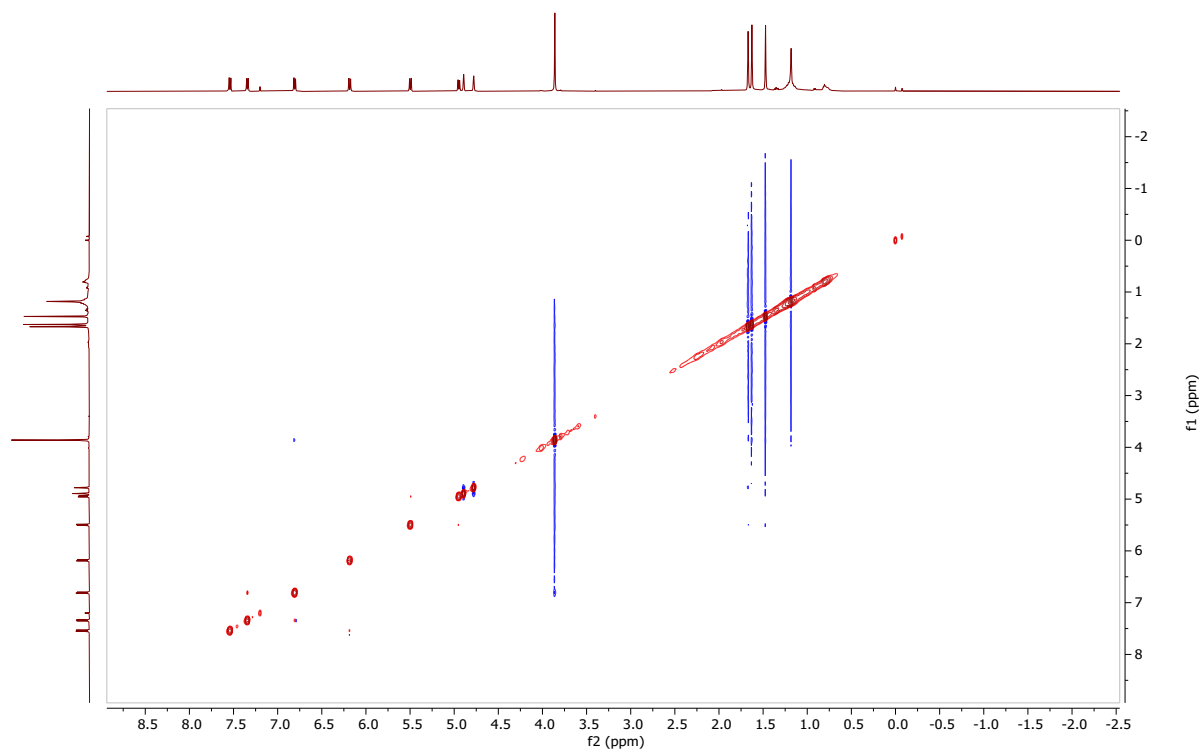

S.19. UV Spectra of compound 2

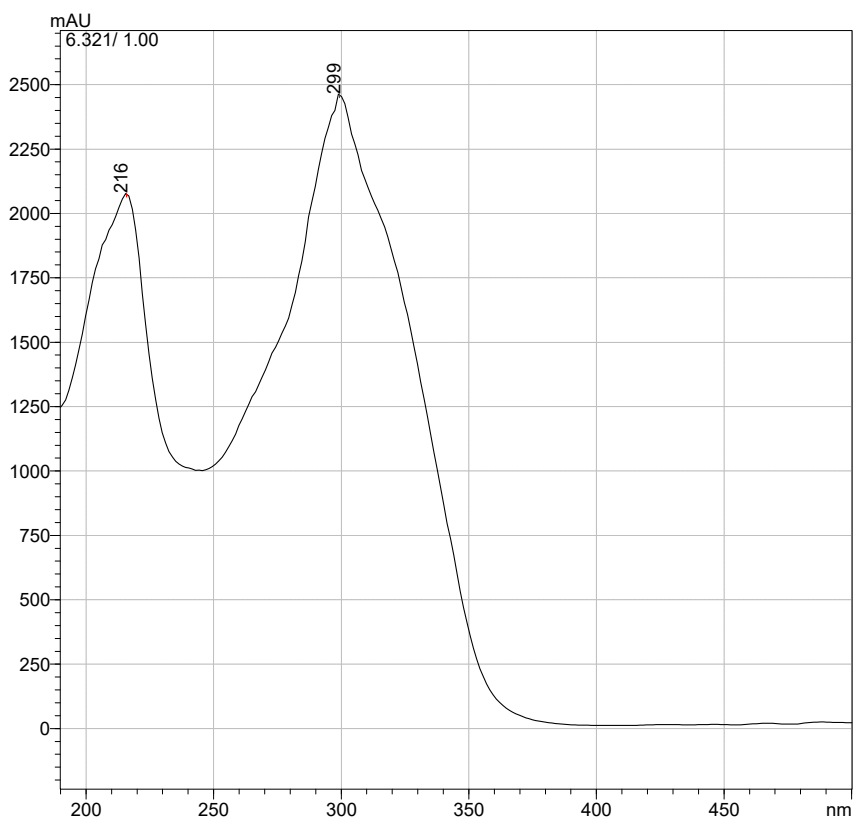

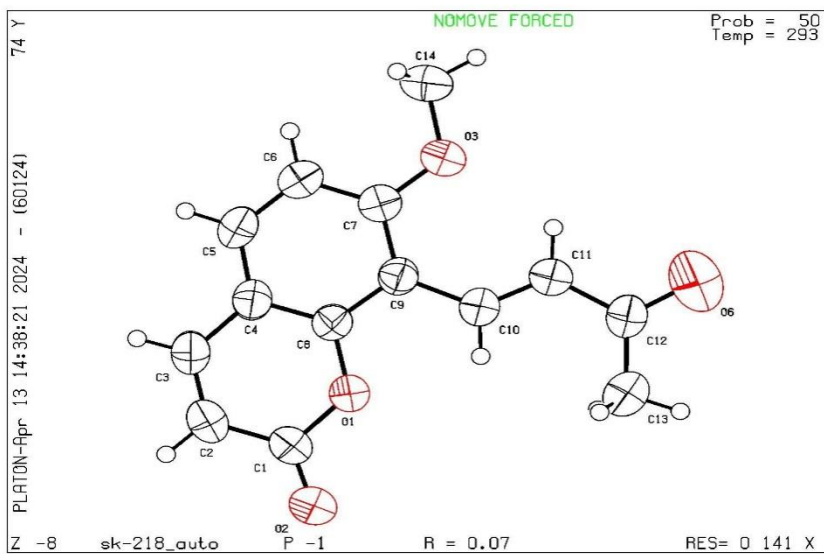

### Spectral information of compound 3

#### S.20. UV Spectra of compound 3

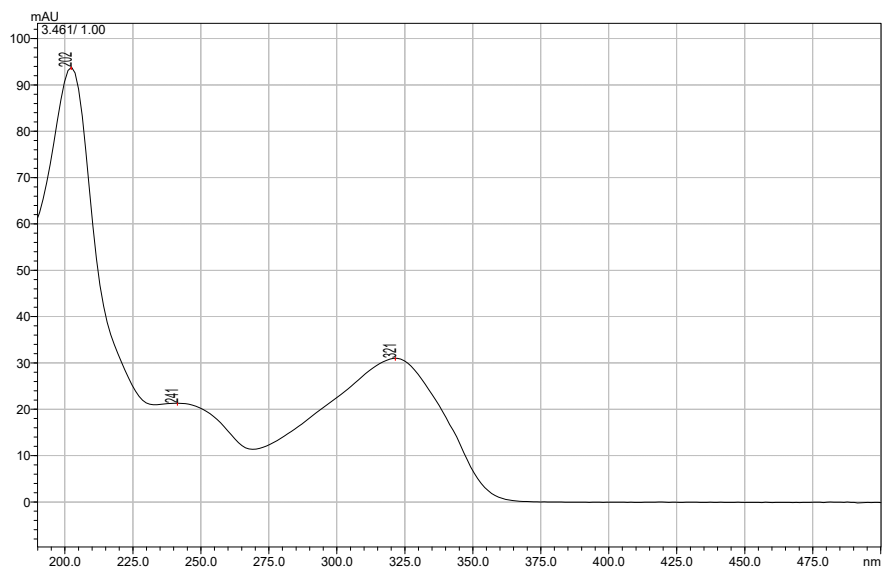

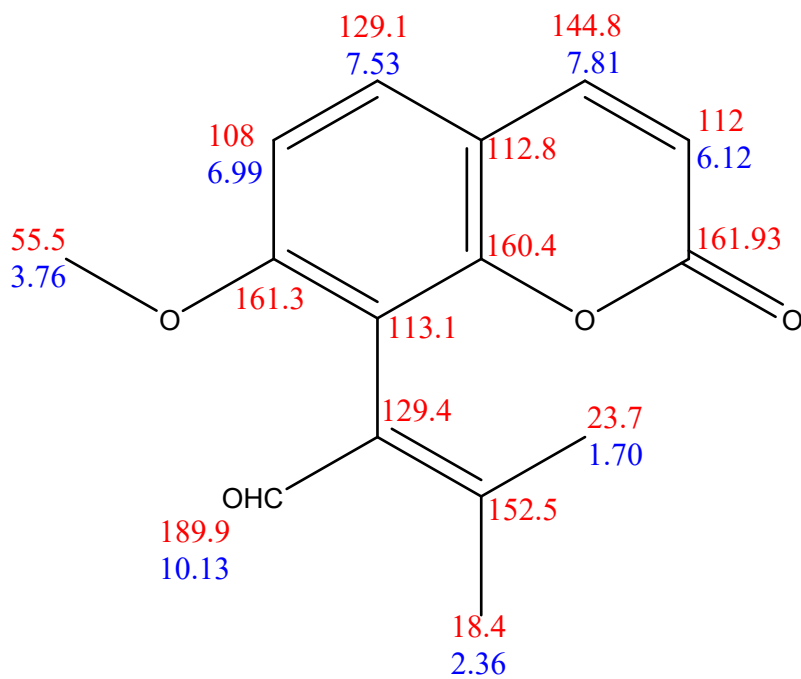

S.21. <sup>1</sup>H NMR spectrum of compound 3 in CD<sub>3</sub>OD

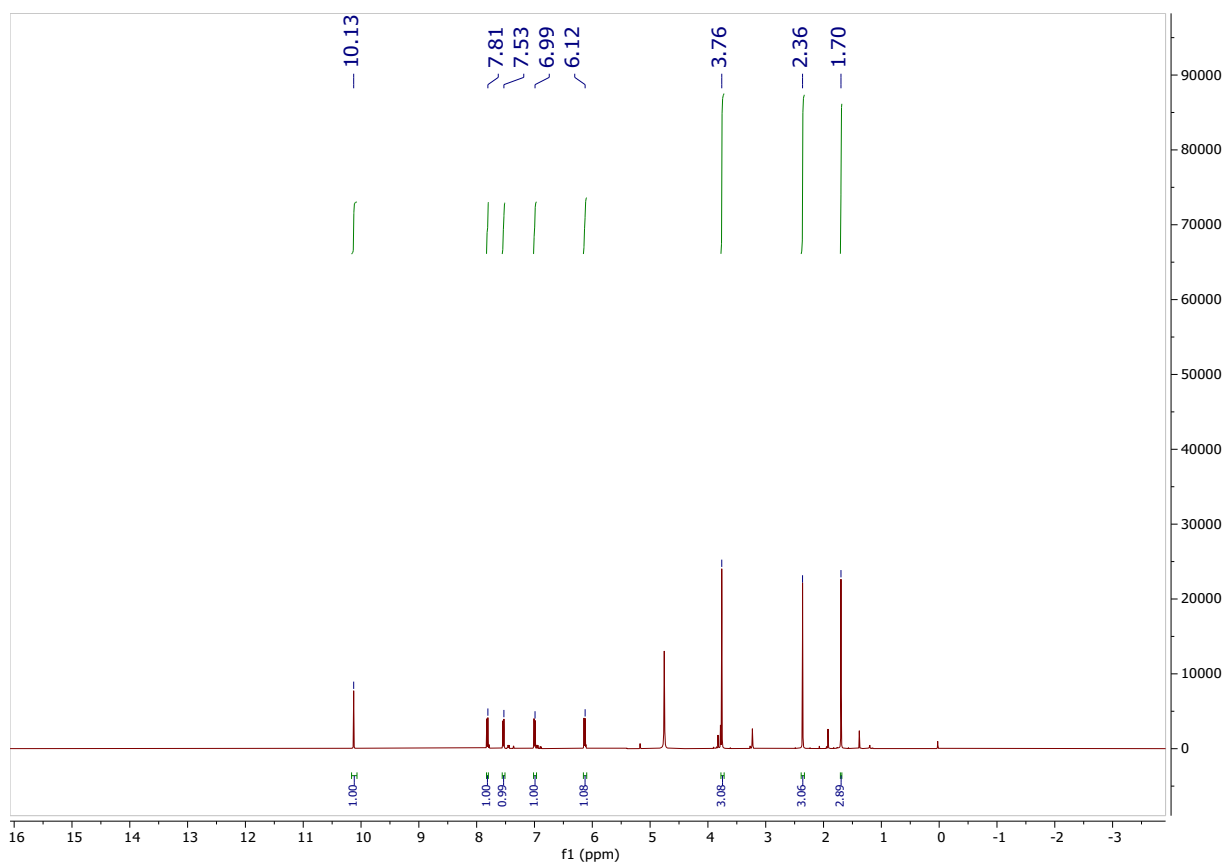

S.22. <sup>13</sup>C NMR spectrum of compound 3 in CD<sub>3</sub>OD

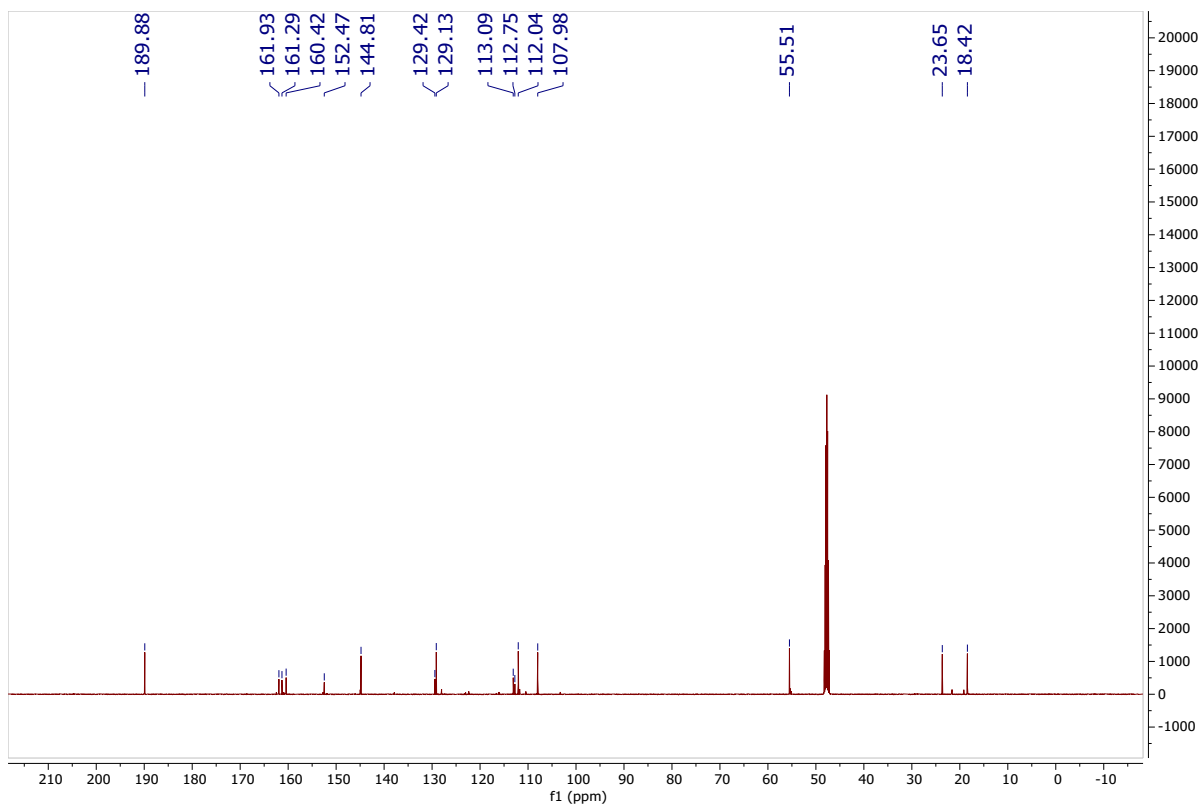

**S.23. DEPT-135 NMR spectrum of compound 3 in CD<sub>3</sub>OD**

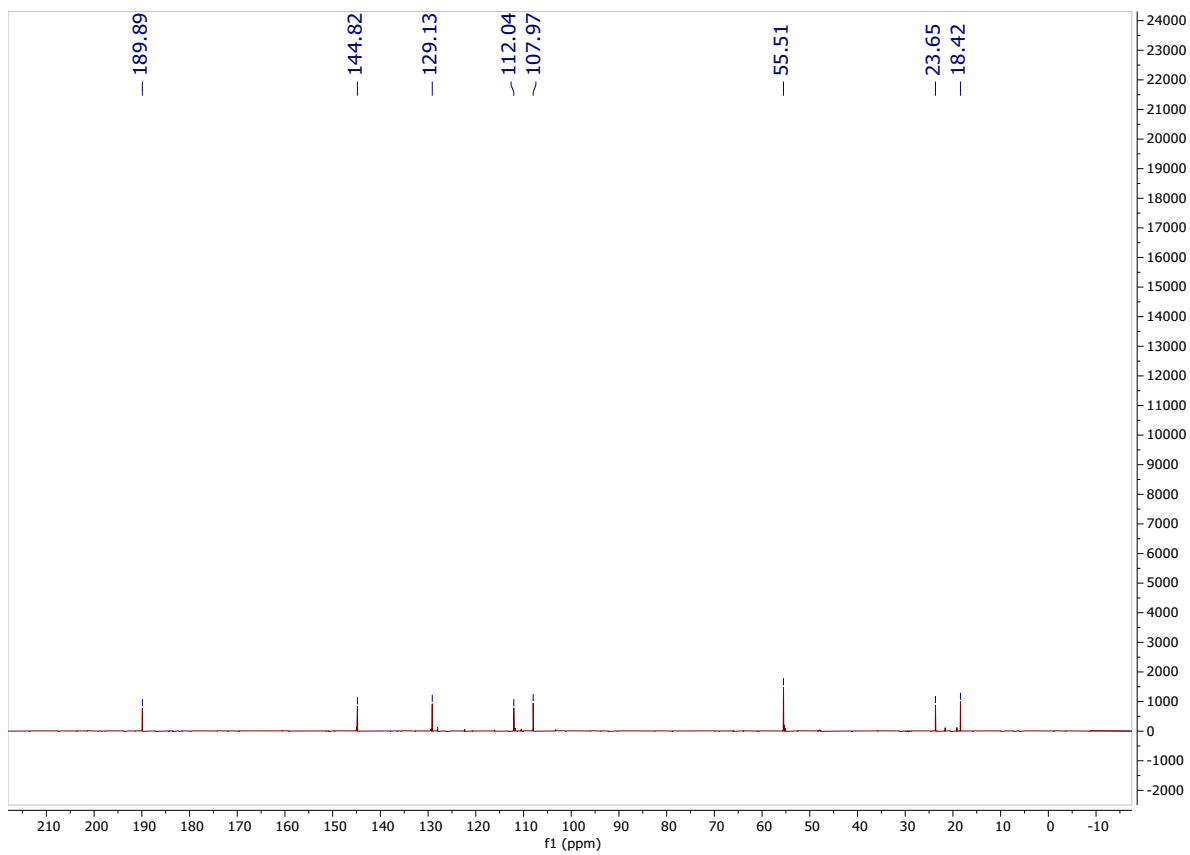

S.24. HSQC spectrum of compound 3 in CD<sub>3</sub>OD

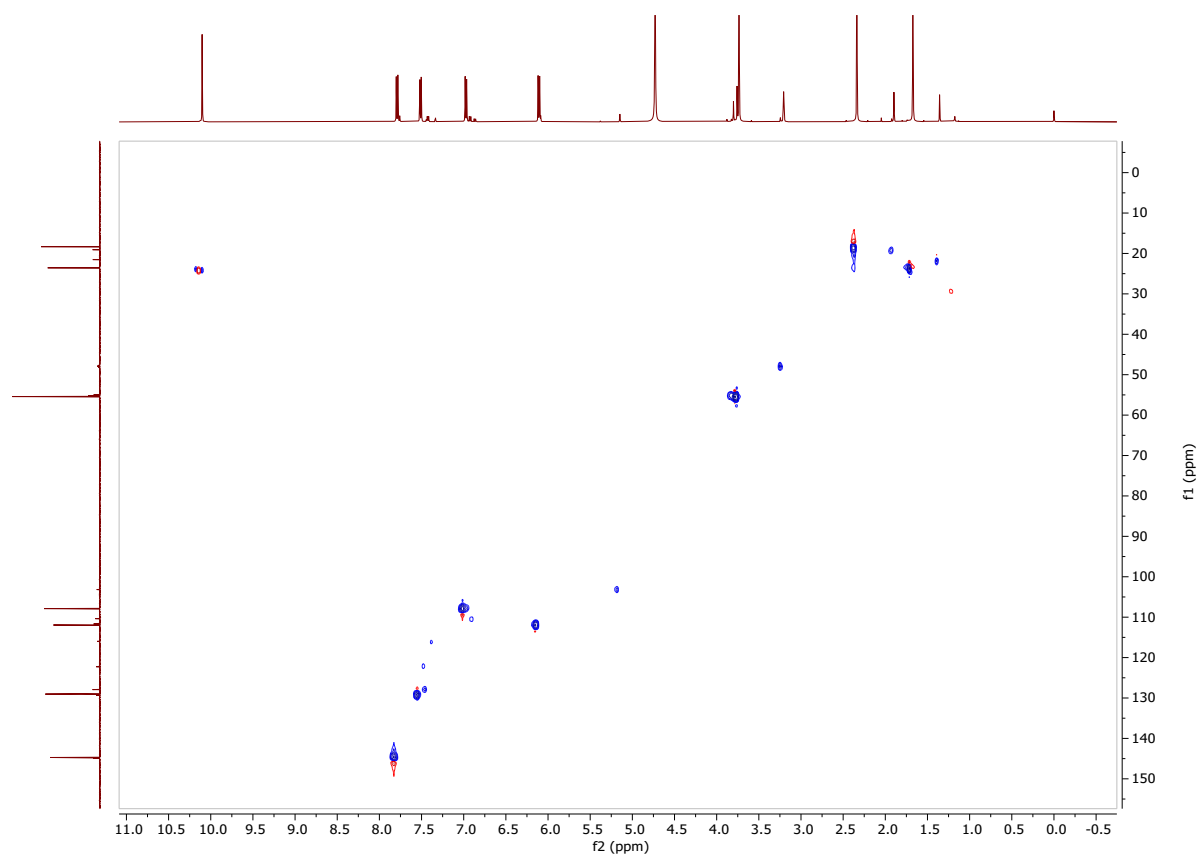

S.25. HMBC spectrum of compound 3 in CD<sub>3</sub>OD

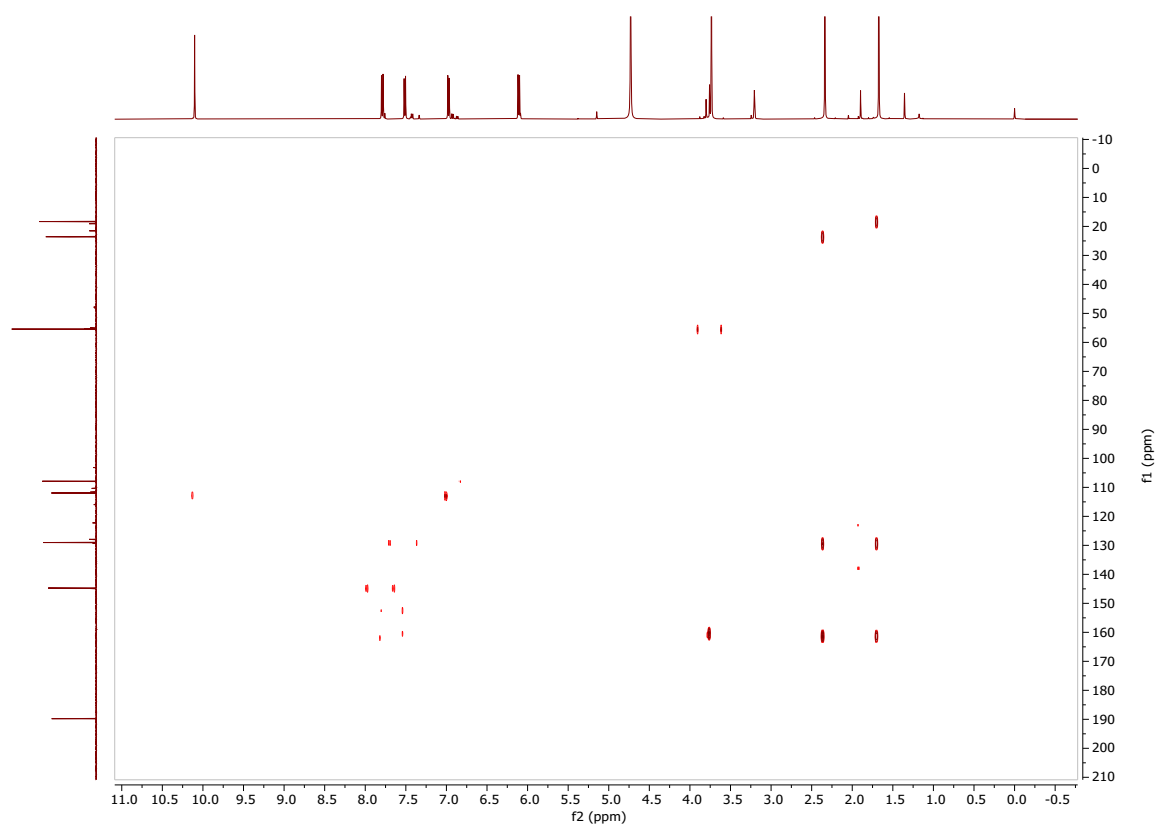

**S.26.**  $^1\text{H}$ - $^1\text{H}$  COSY NMR spectrum of compound 3 in  $\text{CD}_3\text{OD}$

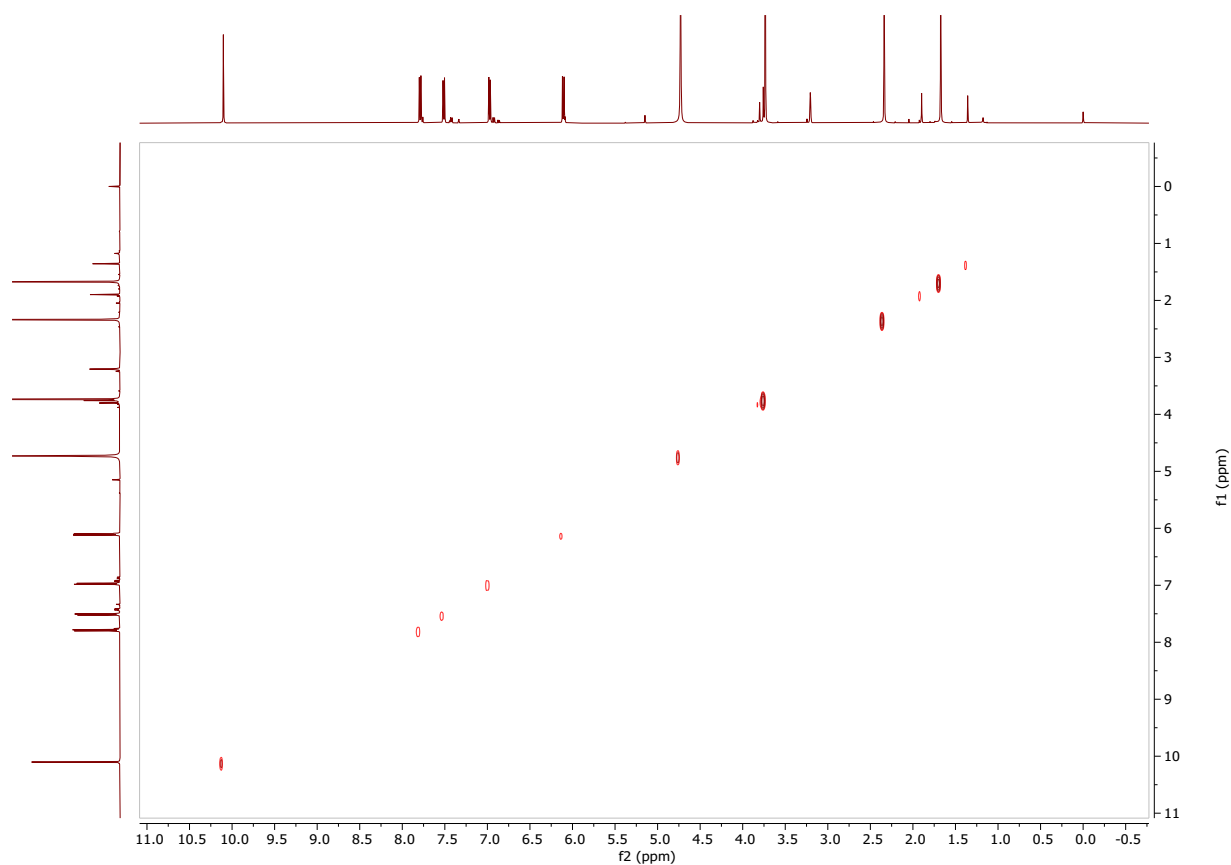

**S.27.** NOESY spectrum of compound 3 in  $\text{CD}_3\text{OD}$

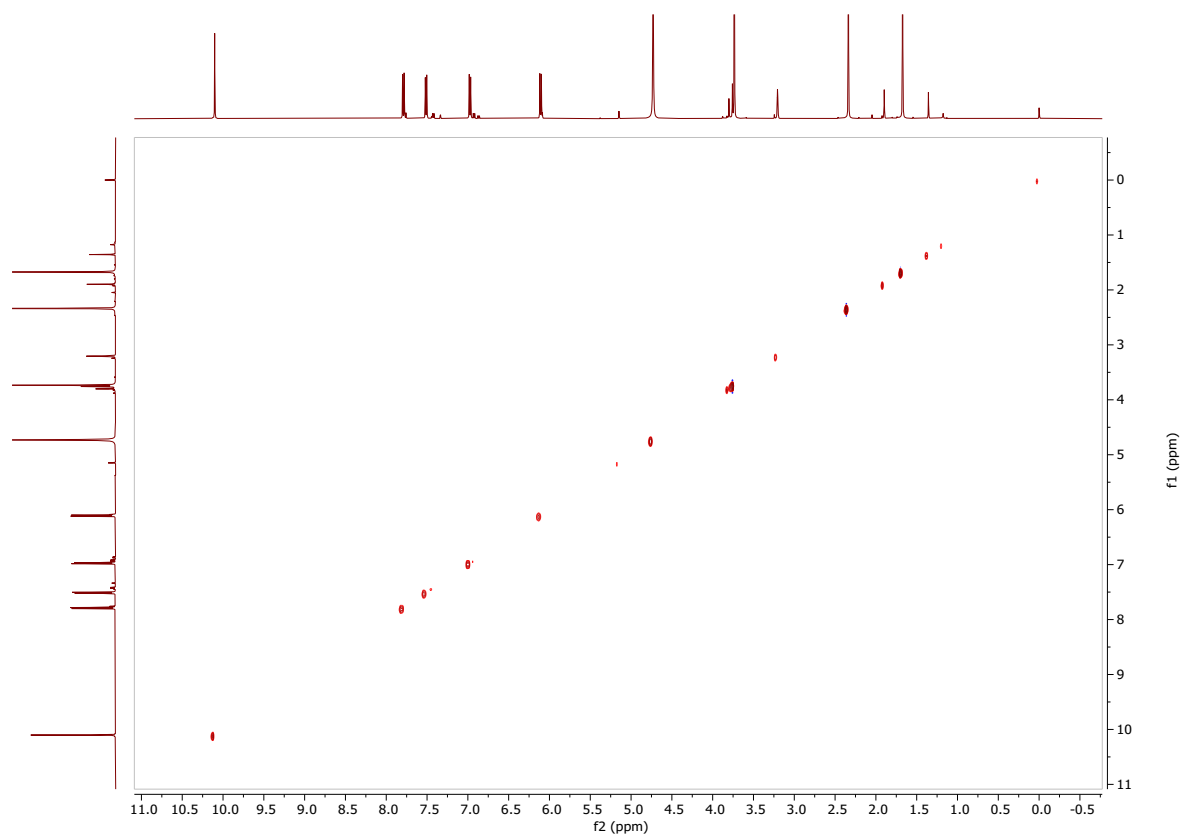

## Spectral information of compound 4

### S.28. UV Spectra of compound 4

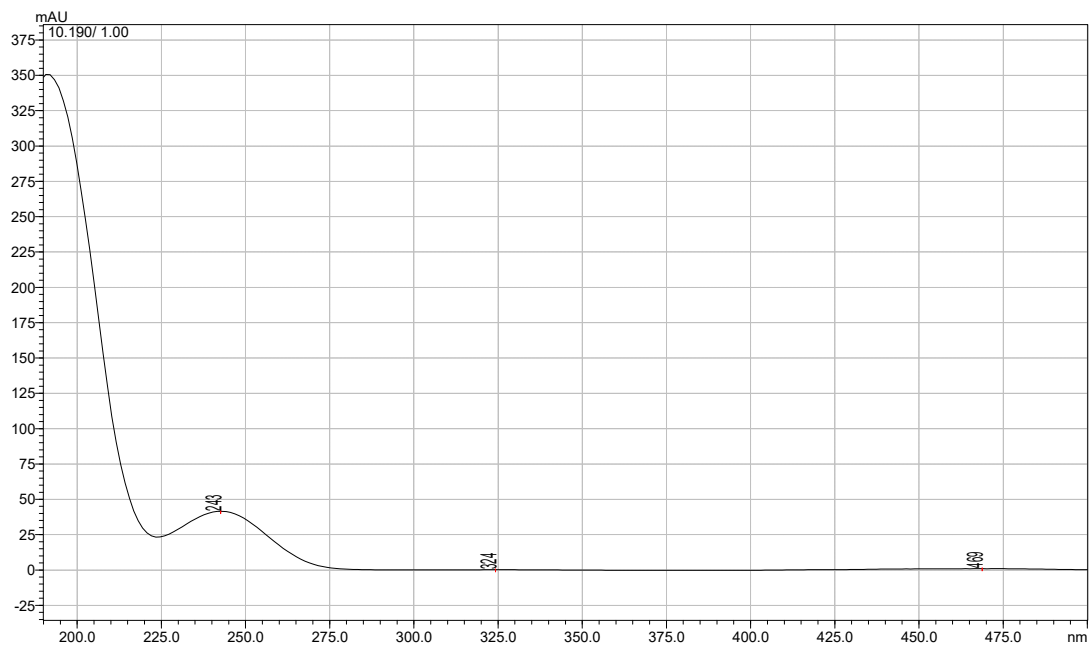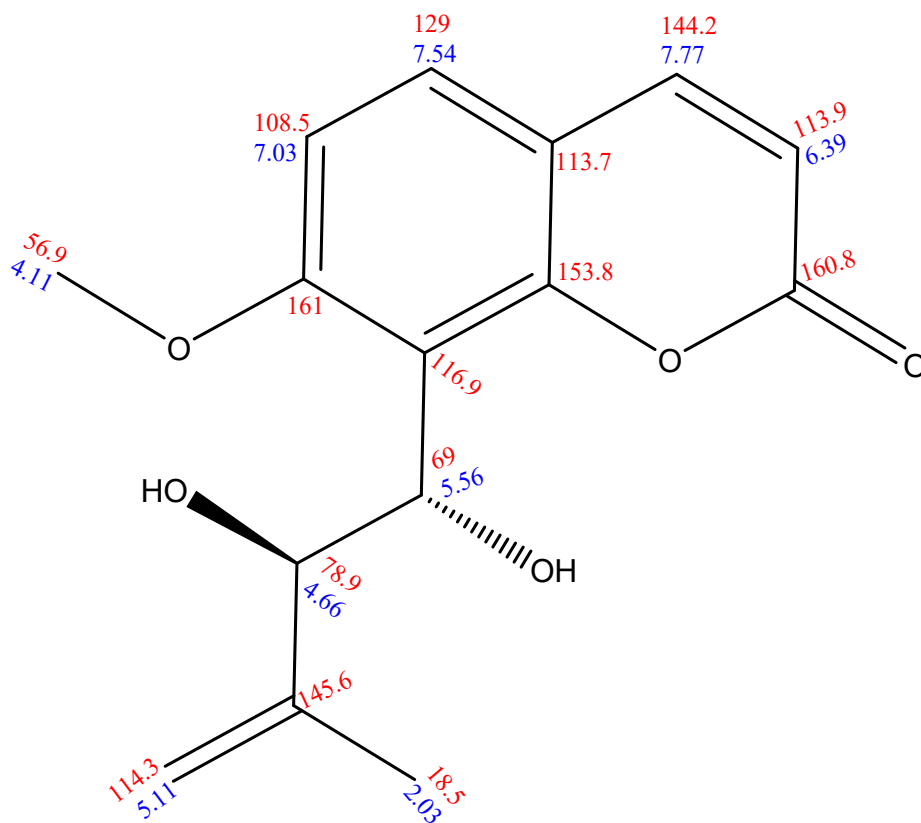

### S.29. <sup>1</sup>H NMR spectrum of compound 4 in CDCl<sub>3</sub>

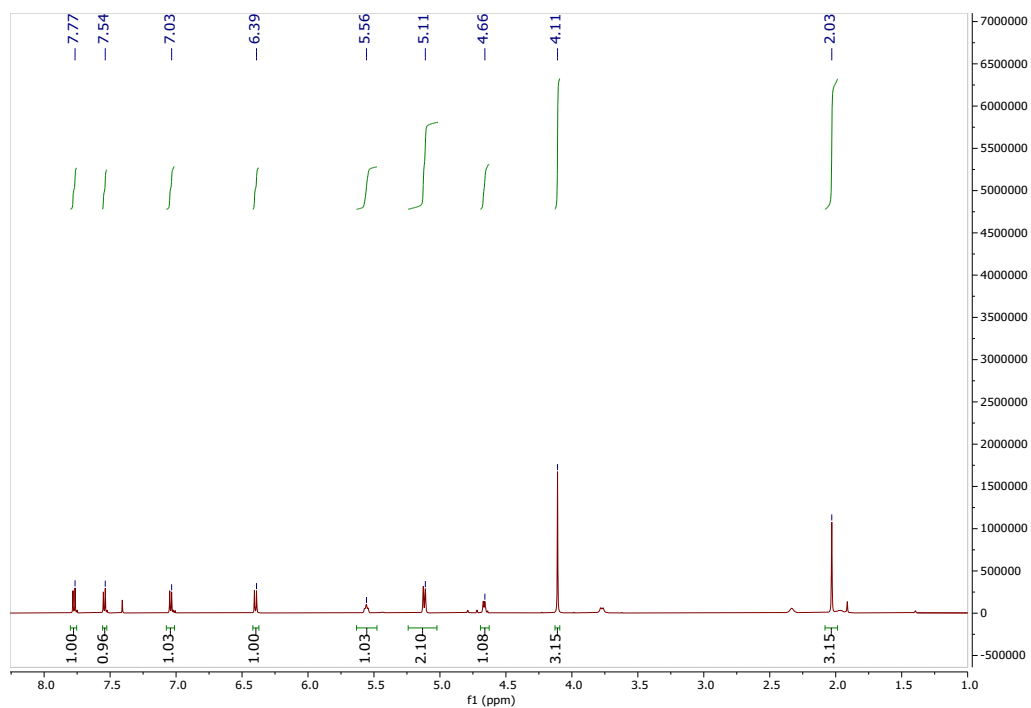

**S.30.**  $^{13}\text{C}$  NMR spectrum of compound 4 in  $\text{CDCl}_3$

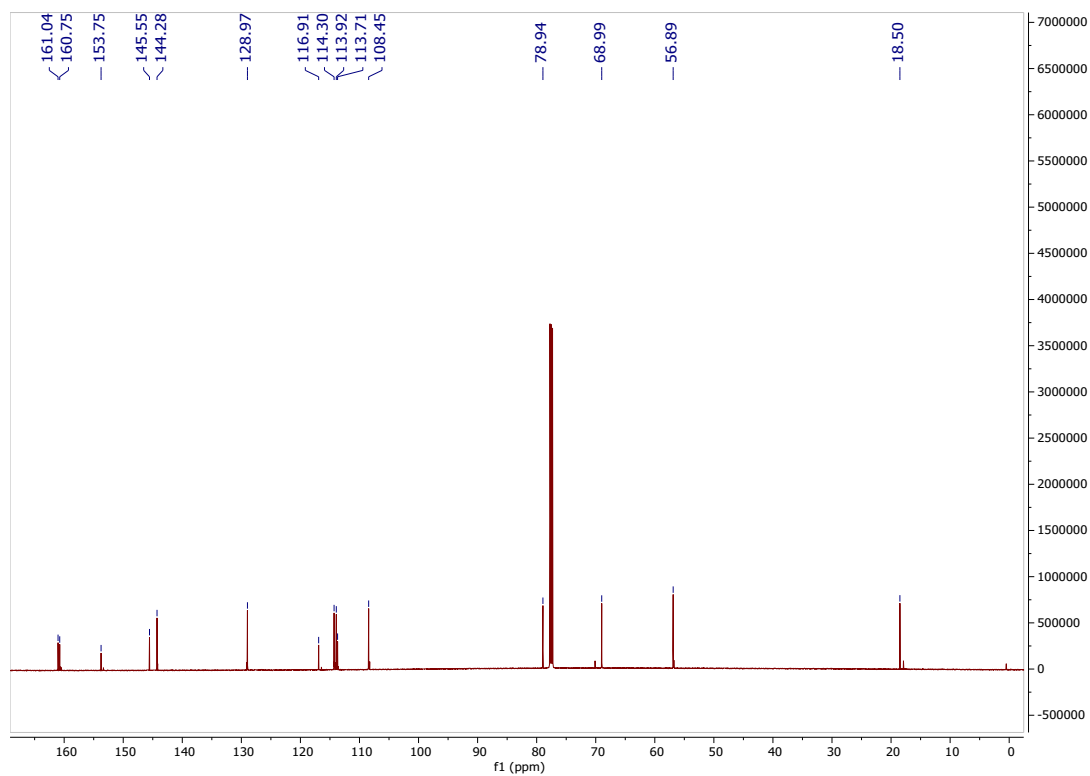

**S.31.** DEPT-135 NMR spectrum of compound 4 in  $\text{CDCl}_3$



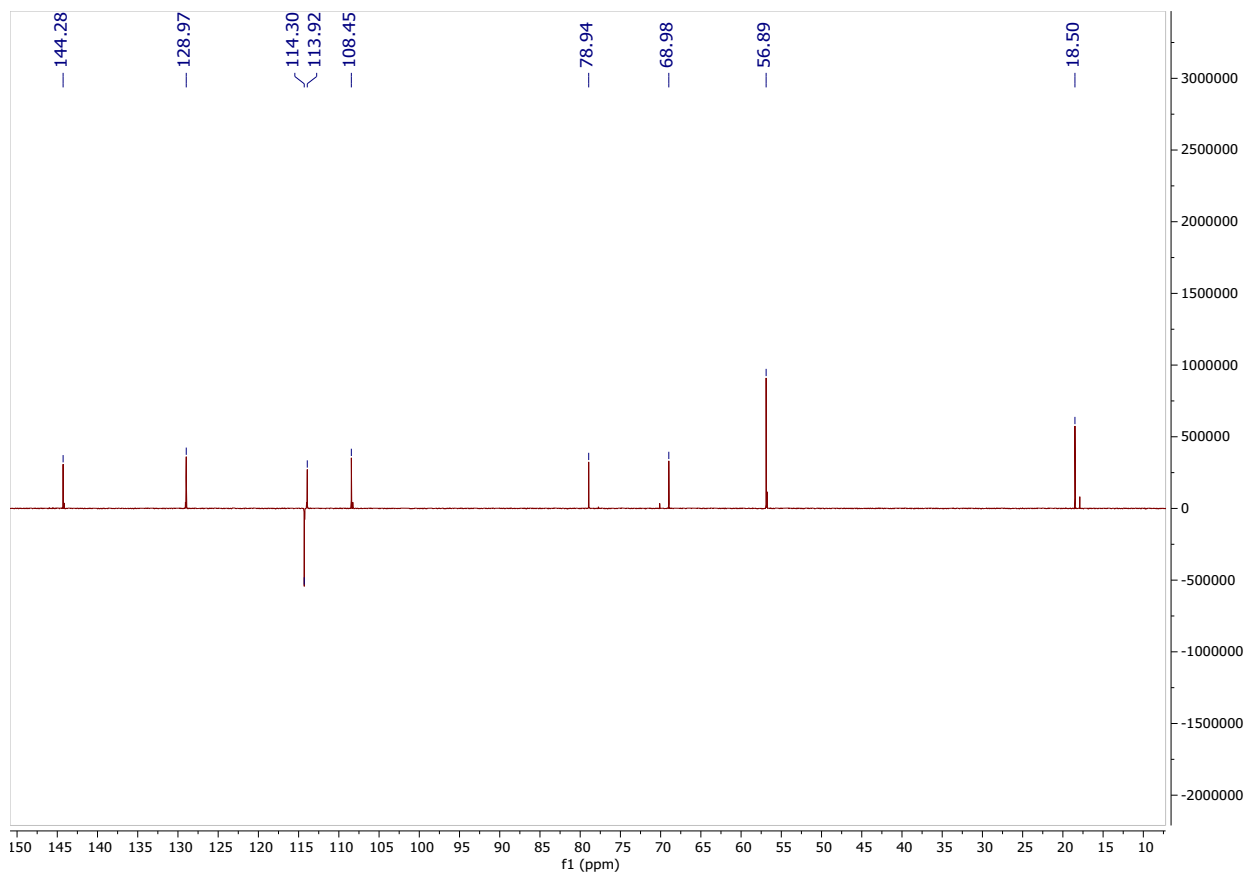

S.32. HSQC spectrum of compound 4 in CDCl<sub>3</sub>

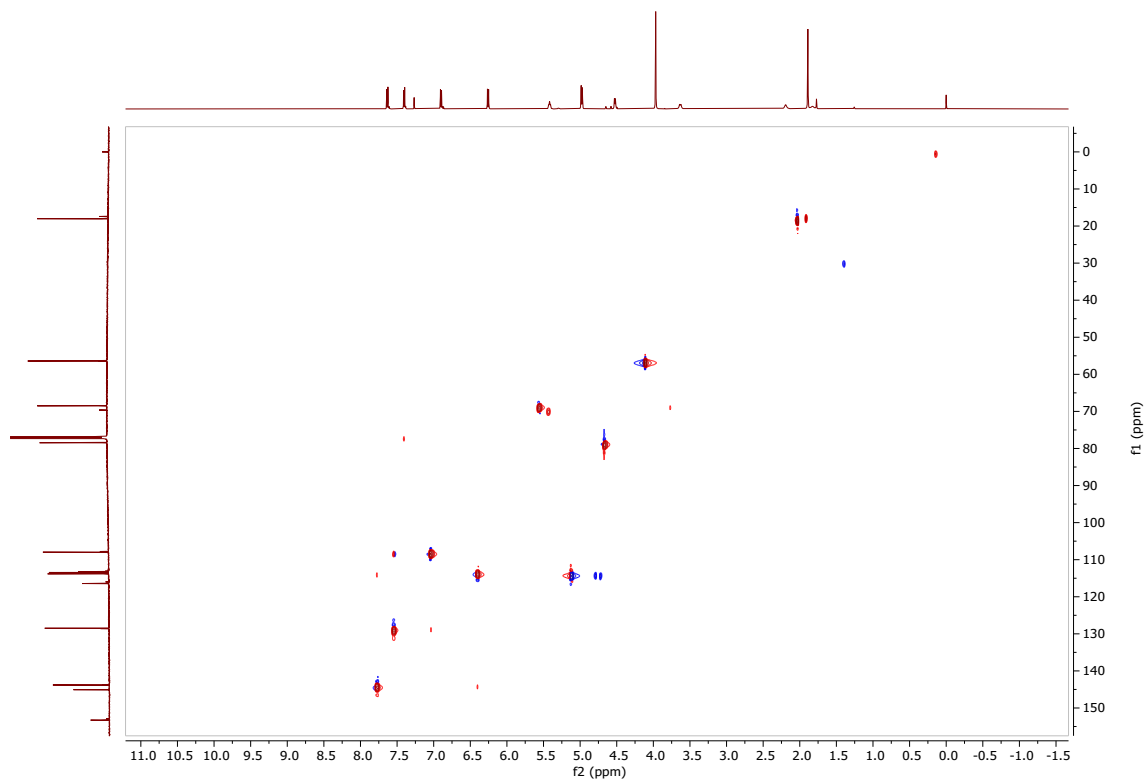

S.33. HMBC spectrum of compound 4 in CDCl<sub>3</sub>

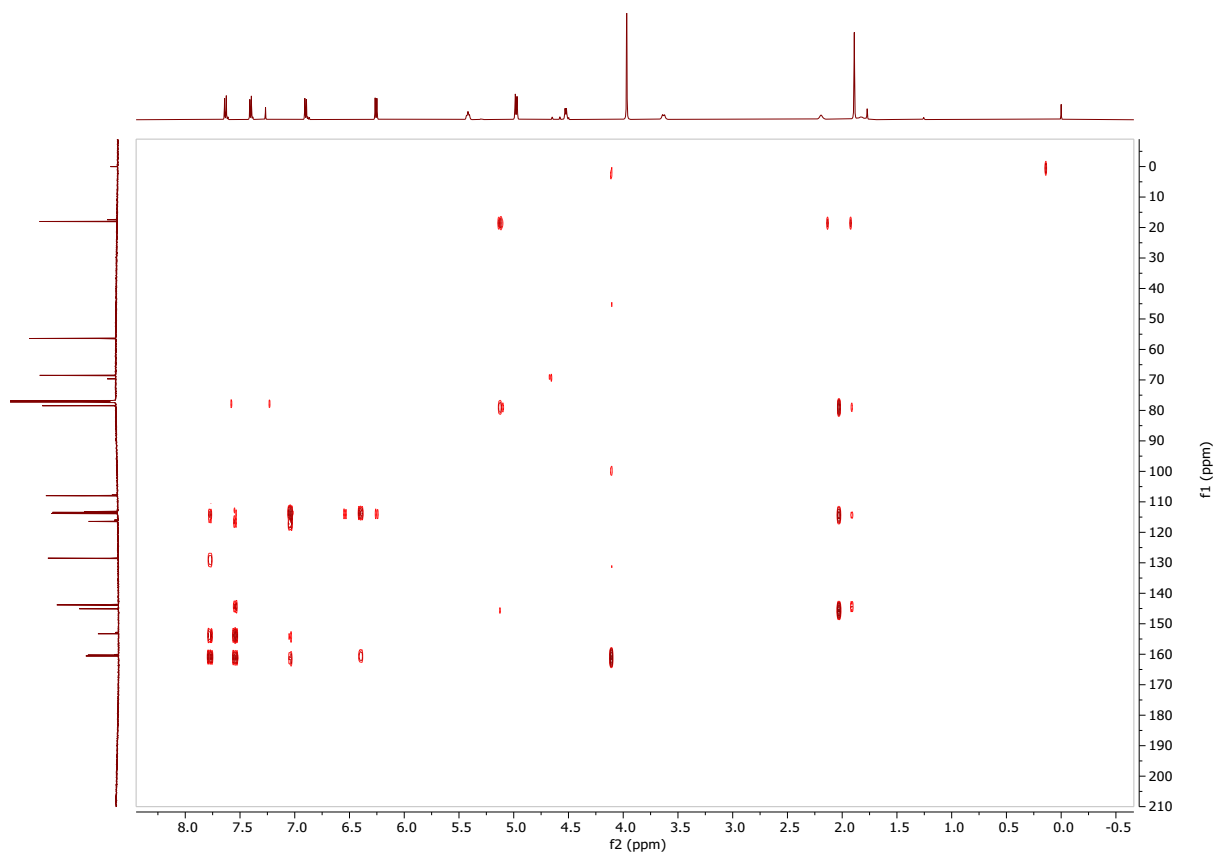

S.34.  $^1\text{H}$ - $^1\text{H}$  COSY NMR spectrum of compound 4 in  $\text{CDCl}_3$

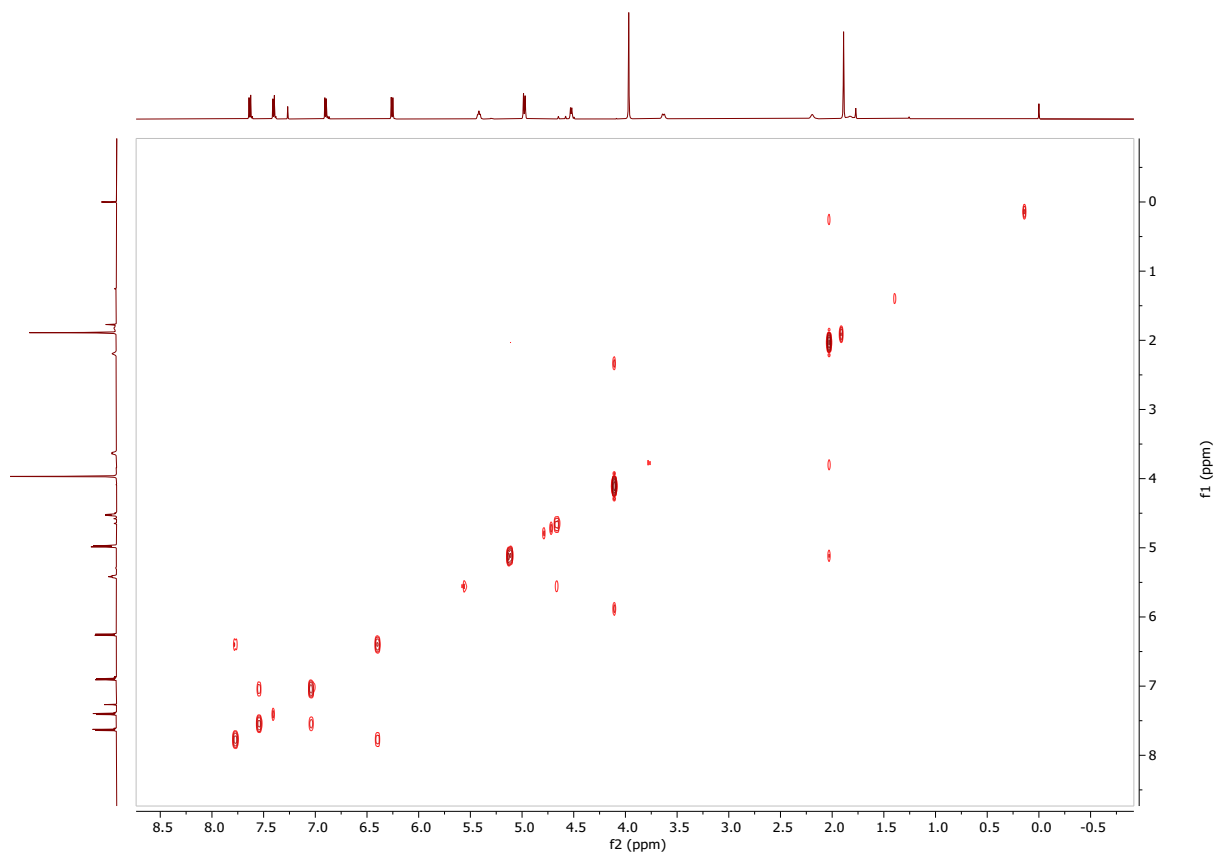

**S 35.** Calculation for DoU

· a compound which contains elements other than carbon and hydrogen:

$$DoU = \frac{2C + 2 + N - X - H}{2}$$

*C* is the number of carbons

*N* is the number of nitrogens

*X* is the number of halogens (F, Cl, Br, I)

*H* is the number of hydrogens
